# Supplementary material for: Ethical and Scientific Implications of the Globalization of Clinical Research
Source: Atypon-hosted journal article supplement (doi:10.1056/nejmsb0803929), 2009-02-18
Supplement: nejm_glickman_816sa1.pdf [file nejm_glickman_816sa1.pdf]

## Supplementary Appendix

This appendix has been provided by the authors to give readers additional information about their work.

Supplement to: Glickman SW, McHutchison JG, Peterson ED, et al. Ethical and scientific implications of the globalization of clinical research. *N Engl J Med* 2009;360:816-23.

## DCRI COMMERCIAL RELATIONSHIPS TRACKING FORM

Date: November 25, 2008

Name: Seth W. Glickman, MD

Title: Research Fellow, DCRI; Assistant Professor of Emergency Medicine, University of North Carolina School of Medicine

Address: Center for Clinical and Genetic Economics, Duke Clinical Research Institute, PO Box 17969, Durham, NC 27715

Monetary amounts are on an annual basis.

| Company         | (1) A research grant or contract from this company partially supports my university salary and/or research projects. | (2) Educational activities or lectures for this company generate revenue for the university. | (3) Consulting or other services (including CME and other non-CME) for this company generates personal income. | (4) I receive significant personal royalties from this company. | (5) I have equity in this company.  | Comments             |
|-----------------|----------------------------------------------------------------------------------------------------------------------|----------------------------------------------------------------------------------------------|----------------------------------------------------------------------------------------------------------------|-----------------------------------------------------------------|-------------------------------------|----------------------|
| GlaxoSmithKline | <input type="checkbox"/>                                                                                             | <input type="checkbox"/>                                                                     | <input type="checkbox"/>                                                                                       | <input type="checkbox"/>                                        | <input checked="" type="checkbox"/> | Within past 2 years. |
| Hansen Medical  | <input type="checkbox"/>                                                                                             | <input type="checkbox"/>                                                                     | <input type="checkbox"/>                                                                                       | <input type="checkbox"/>                                        | <input checked="" type="checkbox"/> | Within past 2 years. |
| Medtronic       | <input type="checkbox"/>                                                                                             | <input type="checkbox"/>                                                                     | <input type="checkbox"/>                                                                                       | <input type="checkbox"/>                                        | <input checked="" type="checkbox"/> | Within past 2 years. |

- 1) A research grant from this organization funds my effort for projects in which I serve as an investigator or other member of the study team. The company makes payments to the university for the work performed under these contracts. These funds support a portion of my salary as a faculty member reflecting a percent effort on the project and/or supports expenses associated with projects at the university that are under my direction.
- 2) I provide educational activities or deliver occasional lectures that generate revenue from this company. The company pays all revenues from these activities to the university. I take none of the the revenues for personal income.
- 3) I receive personal income from this company outside of my university salary for consulting or other services.
- 4) I receive royalties in excess of \$10,000 from this company.
- 5) I or an immediate member of my family have equity in this company (with shareholder voting privileges).

## DCRI COMMERCIAL RELATIONSHIPS TRACKING FORM

Date: November 24, 2008

Name: John G. McHutchison, MD

Title: Director, GI/Hepatology Research Group, DCRI; Professor of Medicine, Duke University School of Medicine

Address: Duke Clinical Research Institute, PO Box 17969, Durham, NC 27715

Monetary amounts are on an annual basis.

| Company                 | (1) A research grant or contract from this company partially supports my university salary and/or research projects. | (2) Educational activities or lectures for this company generate revenue for the university. | (3) Consulting or other services (including CME and other non-CME) for this company generates personal income. | (4) I receive significant personal royalties from this company. | (5) I have equity in this company. | Comments             |
|-------------------------|----------------------------------------------------------------------------------------------------------------------|----------------------------------------------------------------------------------------------|----------------------------------------------------------------------------------------------------------------|-----------------------------------------------------------------|------------------------------------|----------------------|
| Abbott                  | <input checked="" type="checkbox"/>                                                                                  | <input type="checkbox"/>                                                                     | <input checked="" type="checkbox"/>                                                                            | <input type="checkbox"/>                                        | <input type="checkbox"/>           | Within past 2 years. |
| Biolex                  | <input type="checkbox"/>                                                                                             | <input type="checkbox"/>                                                                     | <input checked="" type="checkbox"/>                                                                            | <input type="checkbox"/>                                        | <input type="checkbox"/>           | Within past 2 years. |
| GlaxoSmithKline         | <input checked="" type="checkbox"/>                                                                                  | <input type="checkbox"/>                                                                     | <input checked="" type="checkbox"/>                                                                            | <input type="checkbox"/>                                        | <input type="checkbox"/>           | Within past 2 years. |
| Globe Immune            | <input checked="" type="checkbox"/>                                                                                  | <input type="checkbox"/>                                                                     | <input type="checkbox"/>                                                                                       | <input type="checkbox"/>                                        | <input type="checkbox"/>           | Within past 2 years. |
| Gilead                  | <input checked="" type="checkbox"/>                                                                                  | <input type="checkbox"/>                                                                     | <input checked="" type="checkbox"/>                                                                            | <input type="checkbox"/>                                        | <input type="checkbox"/>           | Within past 2 years. |
| Human Genome Sciences   | <input checked="" type="checkbox"/>                                                                                  | <input type="checkbox"/>                                                                     | <input checked="" type="checkbox"/>                                                                            | <input type="checkbox"/>                                        | <input type="checkbox"/>           | Within past 2 years. |
| Idera                   | <input type="checkbox"/>                                                                                             | <input type="checkbox"/>                                                                     | <input checked="" type="checkbox"/>                                                                            | <input type="checkbox"/>                                        | <input type="checkbox"/>           | Within past 2 years. |
| Intarcia                | <input checked="" type="checkbox"/>                                                                                  | <input type="checkbox"/>                                                                     | <input checked="" type="checkbox"/>                                                                            | <input type="checkbox"/>                                        | <input type="checkbox"/>           | Within past 2 years. |
| Medtronic               | <input checked="" type="checkbox"/>                                                                                  | <input type="checkbox"/>                                                                     | <input type="checkbox"/>                                                                                       | <input type="checkbox"/>                                        | <input type="checkbox"/>           | Within past 2 years. |
| National Genetics Inst. | <input type="checkbox"/>                                                                                             | <input type="checkbox"/>                                                                     | <input checked="" type="checkbox"/>                                                                            | <input type="checkbox"/>                                        | <input type="checkbox"/>           | Within past 2 years. |
| Novartis                | <input checked="" type="checkbox"/>                                                                                  | <input type="checkbox"/>                                                                     | <input checked="" type="checkbox"/>                                                                            | <input type="checkbox"/>                                        | <input type="checkbox"/>           | Within past 2 years. |
| Pharmasset              | <input checked="" type="checkbox"/>                                                                                  | <input type="checkbox"/>                                                                     | <input checked="" type="checkbox"/>                                                                            | <input type="checkbox"/>                                        | <input type="checkbox"/>           | Within past 2 years. |
| Pfizer                  | <input checked="" type="checkbox"/>                                                                                  | <input type="checkbox"/>                                                                     | <input checked="" type="checkbox"/>                                                                            | <input type="checkbox"/>                                        | <input type="checkbox"/>           | Within past 2 years. |
| Roche                   | <input checked="" type="checkbox"/>                                                                                  | <input type="checkbox"/>                                                                     | <input checked="" type="checkbox"/>                                                                            | <input type="checkbox"/>                                        | <input type="checkbox"/>           | Within past 2 years. |
| Sanofi-Aventis          | <input checked="" type="checkbox"/>                                                                                  | <input type="checkbox"/>                                                                     | <input type="checkbox"/>                                                                                       | <input type="checkbox"/>                                        | <input type="checkbox"/>           | Within past 2 years. |
| Schering Plough         | <input checked="" type="checkbox"/>                                                                                  | <input type="checkbox"/>                                                                     | <input checked="" type="checkbox"/>                                                                            | <input type="checkbox"/>                                        | <input type="checkbox"/>           | Within past 2 years. |
| Vertex Pharmaceuticals  | <input checked="" type="checkbox"/>                                                                                  | <input type="checkbox"/>                                                                     | <input checked="" type="checkbox"/>                                                                            | <input type="checkbox"/>                                        | <input type="checkbox"/>           | Within past 2 years. |
| Virochem                | <input checked="" type="checkbox"/>                                                                                  | <input type="checkbox"/>                                                                     | <input checked="" type="checkbox"/>                                                                            | <input type="checkbox"/>                                        | <input type="checkbox"/>           | Within past 2 years. |

| Company | (1) A research grant or contract from this company partially supports my university salary and/or research projects. | (2) Educational activities or lectures for this company generate revenue for the university. | (3) Consulting or other services (including CME and other non-CME) for this company generates personal income. | (4) I receive significant personal royalties from this company. | (5) I have equity in this company. | Comments             |
|---------|----------------------------------------------------------------------------------------------------------------------|----------------------------------------------------------------------------------------------|----------------------------------------------------------------------------------------------------------------|-----------------------------------------------------------------|------------------------------------|----------------------|
| Wyeth   | <input checked="" type="checkbox"/>                                                                                  | <input type="checkbox"/>                                                                     | <input checked="" type="checkbox"/>                                                                            | <input type="checkbox"/>                                        | <input type="checkbox"/>           | Within past 2 years. |

- 1) A research grant from this organization funds my effort for projects in which I serve as an investigator or other member of the study team. The company makes payments to the university for the work performed under these contracts. These funds support a portion of my salary as a faculty member reflecting a percent effort on the project and/or supports expenses associated with projects at the university that are under my direction.
- 2) I provide educational activities or deliver occasional lectures that generate revenue from this company. The company pays all revenues from these activities to the university. I take none of the the revenues for personal income.
- 3) I receive personal income from this company outside of my university salary for consulting or other services.
- 4) I receive royalties in excess of \$10,000 from this company.
- 5) I or an immediate member of my family have equity in this company >\$10,000 or >1% (with shareholder voting privileges).

## DCRI COMMERCIAL RELATIONSHIPS TRACKING FORM

Date: November 19, 2008

Name: Eric D. Peterson, MD, MPH

Title: Associate Director, DCRI; Professor of Medicine, Duke University School of Medicine

Address: Duke Clinical Research Institute, PO Box 17969, Durham, NC 27715

Monetary amounts are on an annual basis.

| Company                      | (1) A research grant or contract from this company partially supports my university salary and/or research projects. | (2) Educational activities or lectures for this company generate revenue for the university. | (3) Consulting or other services (including CME and other non-CME) for this company generates personal income. | (4) I receive significant personal royalties from this company. | (5) I have equity in this company. | Comments             |
|------------------------------|----------------------------------------------------------------------------------------------------------------------|----------------------------------------------------------------------------------------------|----------------------------------------------------------------------------------------------------------------|-----------------------------------------------------------------|------------------------------------|----------------------|
| Bristol-Myers Squibb Company | <input checked="" type="checkbox"/>                                                                                  | <input type="checkbox"/>                                                                     | <input type="checkbox"/>                                                                                       | <input type="checkbox"/>                                        | <input type="checkbox"/>           | Within past 2 years. |
| Merck/Schering Plough        | <input checked="" type="checkbox"/>                                                                                  | <input type="checkbox"/>                                                                     | <input type="checkbox"/>                                                                                       | <input type="checkbox"/>                                        | <input type="checkbox"/>           | Within past 2 years. |
| Sanofi-Aventis               | <input checked="" type="checkbox"/>                                                                                  | <input type="checkbox"/>                                                                     | <input type="checkbox"/>                                                                                       | <input type="checkbox"/>                                        | <input type="checkbox"/>           | Within past 2 years. |
| Schering Plough              | <input checked="" type="checkbox"/>                                                                                  | <input type="checkbox"/>                                                                     | <input type="checkbox"/>                                                                                       | <input type="checkbox"/>                                        | <input type="checkbox"/>           | Within past 2 years. |
| Saint Judes, Inc             | <input checked="" type="checkbox"/>                                                                                  | <input type="checkbox"/>                                                                     | <input type="checkbox"/>                                                                                       | <input type="checkbox"/>                                        | <input type="checkbox"/>           | Within past 2 years. |

- 1) A research grant from this organization funds my effort for projects in which I serve as an investigator or other member of the study team. The company makes payments to the university for the work performed under these contracts. These funds support a portion of my salary as a faculty member reflecting a percent effort on the project and/or supports expenses associated with projects at the university that are under my direction.
- 2) I provide educational activities or deliver occasional lectures that generate revenue from this company. The company pays all revenues from these activities to the university. I take none of the the revenues for personal income.
- 3) I receive personal income from this company outside of my university salary for consulting or other services.
- 4) I receive royalties in excess of \$10,000 from this company.
- 5) I or an immediate member of my family have equity in this company >\$10,000 or >1% (with shareholder voting privileges).

## DCRI COMMERCIAL RELATIONSHIPS TRACKING FORM

Date: November 17, 2008  
 Name: Charles B. Cairns, MD  
 Title: Consulting Associate, DCRI; Professor and Chair of Emergency Medicine, University of North Carolina School of Medicine  
 Address: UNC School of Medicine, Department of Emergency Medicine, 170 Manning Dr, CB# 7594, Chapel Hill, NC 27599-7594

Monetary amounts are on an annual basis.

| Company                       | (1) A research grant or contract from this company partially supports my university salary and/or research projects. | (2) Educational activities or lectures for this company generate revenue for the university. | (3) Consulting or other services (including CME and other non-CME) for this company generates personal income. | (4) I receive significant personal royalties from this company. | (5) I have equity in this company. | Comments             |
|-------------------------------|----------------------------------------------------------------------------------------------------------------------|----------------------------------------------------------------------------------------------|----------------------------------------------------------------------------------------------------------------|-----------------------------------------------------------------|------------------------------------|----------------------|
| bioMerieux                    | <input checked="" type="checkbox"/>                                                                                  | <input type="checkbox"/>                                                                     | <input checked="" type="checkbox"/>                                                                            | <input type="checkbox"/>                                        | <input type="checkbox"/>           | Within past 2 years. |
| BRAHMS                        | <input type="checkbox"/>                                                                                             | <input type="checkbox"/>                                                                     | <input checked="" type="checkbox"/>                                                                            | <input type="checkbox"/>                                        | <input type="checkbox"/>           | Within past 2 years. |
| Critical Therapeutics         | <input type="checkbox"/>                                                                                             | <input type="checkbox"/>                                                                     | <input checked="" type="checkbox"/>                                                                            | <input type="checkbox"/>                                        | <input type="checkbox"/>           | Within past 2 years. |
| Heartscape Technologies       | <input checked="" type="checkbox"/>                                                                                  | <input type="checkbox"/>                                                                     | <input type="checkbox"/>                                                                                       | <input type="checkbox"/>                                        | <input type="checkbox"/>           | Within past 2 years. |
| Johnson & Johnson             | <input checked="" type="checkbox"/>                                                                                  | <input type="checkbox"/>                                                                     | <input type="checkbox"/>                                                                                       | <input type="checkbox"/>                                        | <input type="checkbox"/>           | Within past 2 years. |
| Merck                         | <input type="checkbox"/>                                                                                             | <input type="checkbox"/>                                                                     | <input checked="" type="checkbox"/>                                                                            | <input type="checkbox"/>                                        | <input type="checkbox"/>           | Within past 2 years. |
| National Institutes of Health | <input checked="" type="checkbox"/>                                                                                  | <input type="checkbox"/>                                                                     | <input type="checkbox"/>                                                                                       | <input type="checkbox"/>                                        | <input type="checkbox"/>           | Within past 2 years. |
| Sepracor                      | <input type="checkbox"/>                                                                                             | <input type="checkbox"/>                                                                     | <input checked="" type="checkbox"/>                                                                            | <input type="checkbox"/>                                        | <input type="checkbox"/>           | Within past 2 years. |

- 1) A research grant from this organization funds my effort for projects in which I serve as an investigator or other member of the study team. The company makes payments to the university for the work performed under these contracts. These funds support a portion of my salary as a faculty member reflecting a percent effort on the project and/or supports expenses associated with projects at the university that are under my direction.
- 2) I provide educational activities or deliver occasional lectures that generate revenue from this company. The company pays all revenues from these activities to the university. I take none of the the revenues for personal income.
- 3) I receive personal income from this company outside of my university salary for consulting or other services.
- 4) I receive royalties in excess of \$10,000 from this company.
- 5) I or an immediate member of my family have equity in this company (with shareholder voting privileges).

## DCRI COMMERCIAL RELATIONSHIPS TRACKING FORM

Date: November 17, 2008

Name: Robert A. Harrington, MD

Title: Director, DCRI; Professor of Medicine, Duke University School of Medicine

Address: Duke Clinical Research Institute, PO Box 17969, Durham, NC 27715

Monetary amounts are on an annual basis.

| Company                               | (1) A research grant or contract from this company partially supports my university salary. | (2) Educational activities or lectures for this company generate revenue for the university. | (3) Consulting or other services (including CME and other non-CME) for this company generates personal income. | (4) I receive significant personal royalties from this company. | (5) I have equity in this company. | (6) This company has a research grant or contract with the DCRI. | (7) This company provides support for DCRI fellows. | Comments             |
|---------------------------------------|---------------------------------------------------------------------------------------------|----------------------------------------------------------------------------------------------|----------------------------------------------------------------------------------------------------------------|-----------------------------------------------------------------|------------------------------------|------------------------------------------------------------------|-----------------------------------------------------|----------------------|
| Abbott Laboratories                   | <input type="checkbox"/>                                                                    | <input type="checkbox"/>                                                                     | <input type="checkbox"/>                                                                                       | <input type="checkbox"/>                                        | <input type="checkbox"/>           | <input checked="" type="checkbox"/>                              | <input type="checkbox"/>                            | Within past 2 years. |
| Abbott Vascular Business              | <input type="checkbox"/>                                                                    | <input type="checkbox"/>                                                                     | <input type="checkbox"/>                                                                                       | <input type="checkbox"/>                                        | <input type="checkbox"/>           | <input checked="" type="checkbox"/>                              | <input type="checkbox"/>                            | Within past 2 years. |
| Acorn Cardiovascular                  | <input type="checkbox"/>                                                                    | <input type="checkbox"/>                                                                     | <input type="checkbox"/>                                                                                       | <input type="checkbox"/>                                        | <input type="checkbox"/>           | <input checked="" type="checkbox"/>                              | <input type="checkbox"/>                            | Within past 2 years. |
| Actelion, Ltd.                        | <input type="checkbox"/>                                                                    | <input type="checkbox"/>                                                                     | <input type="checkbox"/>                                                                                       | <input type="checkbox"/>                                        | <input type="checkbox"/>           | <input checked="" type="checkbox"/>                              | <input type="checkbox"/>                            | Within past 2 years. |
| Aastrom Biosciences, Inc.             | <input type="checkbox"/>                                                                    | <input type="checkbox"/>                                                                     | <input type="checkbox"/>                                                                                       | <input type="checkbox"/>                                        | <input type="checkbox"/>           | <input checked="" type="checkbox"/>                              | <input type="checkbox"/>                            | Within past 2 years. |
| Acusphere, Inc.                       | <input type="checkbox"/>                                                                    | <input type="checkbox"/>                                                                     | <input type="checkbox"/>                                                                                       | <input type="checkbox"/>                                        | <input type="checkbox"/>           | <input checked="" type="checkbox"/>                              | <input type="checkbox"/>                            | Within past 2 years. |
| Adolor Corporation                    | <input type="checkbox"/>                                                                    | <input type="checkbox"/>                                                                     | <input type="checkbox"/>                                                                                       | <input type="checkbox"/>                                        | <input type="checkbox"/>           | <input checked="" type="checkbox"/>                              | <input type="checkbox"/>                            | Within past 2 years. |
| Advanced Cardiovascular Systems, Inc. | <input type="checkbox"/>                                                                    | <input type="checkbox"/>                                                                     | <input type="checkbox"/>                                                                                       | <input type="checkbox"/>                                        | <input type="checkbox"/>           | <input checked="" type="checkbox"/>                              | <input type="checkbox"/>                            | Within past 2 years. |
| Air Products, PLC                     | <input type="checkbox"/>                                                                    | <input type="checkbox"/>                                                                     | <input type="checkbox"/>                                                                                       | <input type="checkbox"/>                                        | <input type="checkbox"/>           | <input checked="" type="checkbox"/>                              | <input type="checkbox"/>                            | Within past 2 years. |
| Ajinomoto                             | <input type="checkbox"/>                                                                    | <input type="checkbox"/>                                                                     | <input type="checkbox"/>                                                                                       | <input type="checkbox"/>                                        | <input type="checkbox"/>           | <input checked="" type="checkbox"/>                              | <input type="checkbox"/>                            | Within past 2 years. |
| Alexion, Inc.                         | <input type="checkbox"/>                                                                    | <input type="checkbox"/>                                                                     | <input type="checkbox"/>                                                                                       | <input type="checkbox"/>                                        | <input type="checkbox"/>           | <input checked="" type="checkbox"/>                              | <input type="checkbox"/>                            | Within past 2 years. |
| Allergan, Inc.                        | <input type="checkbox"/>                                                                    | <input type="checkbox"/>                                                                     | <input type="checkbox"/>                                                                                       | <input type="checkbox"/>                                        | <input type="checkbox"/>           | <input checked="" type="checkbox"/>                              | <input type="checkbox"/>                            | Within past 2 years. |
| Alsius Corporation                    | <input type="checkbox"/>                                                                    | <input type="checkbox"/>                                                                     | <input type="checkbox"/>                                                                                       | <input type="checkbox"/>                                        | <input type="checkbox"/>           | <input checked="" type="checkbox"/>                              | <input type="checkbox"/>                            | Within past 2 years. |
| Amgen, Inc.                           | <input type="checkbox"/>                                                                    | <input type="checkbox"/>                                                                     | <input type="checkbox"/>                                                                                       | <input type="checkbox"/>                                        | <input type="checkbox"/>           | <input checked="" type="checkbox"/>                              | <input type="checkbox"/>                            | Within past 2 years. |
| Amylin Pharmaceuticals                | <input type="checkbox"/>                                                                    | <input type="checkbox"/>                                                                     | <input type="checkbox"/>                                                                                       | <input type="checkbox"/>                                        | <input type="checkbox"/>           | <input checked="" type="checkbox"/>                              | <input type="checkbox"/>                            | Within past 2 years. |
| Anadys                                | <input type="checkbox"/>                                                                    | <input type="checkbox"/>                                                                     | <input type="checkbox"/>                                                                                       | <input type="checkbox"/>                                        | <input type="checkbox"/>           | <input checked="" type="checkbox"/>                              | <input type="checkbox"/>                            | Within past 2 years. |
| Anesiva, Inc.                         | <input type="checkbox"/>                                                                    | <input type="checkbox"/>                                                                     | <input type="checkbox"/>                                                                                       | <input type="checkbox"/>                                        | <input type="checkbox"/>           | <input checked="" type="checkbox"/>                              | <input type="checkbox"/>                            | Within past 2 years. |
| Angel Medical Systems, Inc.           | <input type="checkbox"/>                                                                    | <input type="checkbox"/>                                                                     | <input type="checkbox"/>                                                                                       | <input type="checkbox"/>                                        | <input type="checkbox"/>           | <input checked="" type="checkbox"/>                              | <input type="checkbox"/>                            | Within past 2 years. |

| Company                                  | (1) A research grant or contract from this company partially supports my university salary. | (2) Educational activities or lectures for this company generate revenue for the university. | (3) Consulting or other services (including CME and other non-CME) for this company generates personal income. | (4) I receive significant personal royalties from this company. | (5) I have equity in this company. | (6) This company has a research grant or contract with the DCRI. | (7) This company provides support for DCRI fellows. | Comments             |
|------------------------------------------|---------------------------------------------------------------------------------------------|----------------------------------------------------------------------------------------------|----------------------------------------------------------------------------------------------------------------|-----------------------------------------------------------------|------------------------------------|------------------------------------------------------------------|-----------------------------------------------------|----------------------|
| ANGES MG Inc.                            | <input type="checkbox"/>                                                                    | <input type="checkbox"/>                                                                     | <input type="checkbox"/>                                                                                       | <input type="checkbox"/>                                        | <input type="checkbox"/>           | <input checked="" type="checkbox"/>                              | <input type="checkbox"/>                            | Within past 2 years. |
| Angiometrx, Inc.                         | <input type="checkbox"/>                                                                    | <input type="checkbox"/>                                                                     | <input type="checkbox"/>                                                                                       | <input type="checkbox"/>                                        | <input type="checkbox"/>           | <input checked="" type="checkbox"/>                              | <input type="checkbox"/>                            | Within past 2 years. |
| Annenberg Center for Health Sciences     | <input type="checkbox"/>                                                                    | <input type="checkbox"/>                                                                     | <input checked="" type="checkbox"/>                                                                            | <input type="checkbox"/>                                        | <input type="checkbox"/>           | <input type="checkbox"/>                                         | <input type="checkbox"/>                            | Within past 2 years. |
| Ark Therapeutics                         | <input type="checkbox"/>                                                                    | <input type="checkbox"/>                                                                     | <input type="checkbox"/>                                                                                       | <input type="checkbox"/>                                        | <input type="checkbox"/>           | <input checked="" type="checkbox"/>                              | <input type="checkbox"/>                            | Within past 2 years. |
| Astellas Pharma US                       | <input type="checkbox"/>                                                                    | <input type="checkbox"/>                                                                     | <input type="checkbox"/>                                                                                       | <input type="checkbox"/>                                        | <input type="checkbox"/>           | <input checked="" type="checkbox"/>                              | <input type="checkbox"/>                            | Within past 2 years. |
| Astra Hassle                             | <input type="checkbox"/>                                                                    | <input type="checkbox"/>                                                                     | <input type="checkbox"/>                                                                                       | <input type="checkbox"/>                                        | <input type="checkbox"/>           | <input checked="" type="checkbox"/>                              | <input type="checkbox"/>                            | Within past 2 years. |
| AstraZeneca                              | <input checked="" type="checkbox"/>                                                         | <input type="checkbox"/>                                                                     | <input checked="" type="checkbox"/>                                                                            | <input type="checkbox"/>                                        | <input type="checkbox"/>           | <input checked="" type="checkbox"/>                              | <input checked="" type="checkbox"/>                 | Within past 2 years. |
| Atritech                                 | <input type="checkbox"/>                                                                    | <input type="checkbox"/>                                                                     | <input type="checkbox"/>                                                                                       | <input type="checkbox"/>                                        | <input type="checkbox"/>           | <input checked="" type="checkbox"/>                              | <input type="checkbox"/>                            | Within past 2 years. |
| Aventis                                  | <input type="checkbox"/>                                                                    | <input type="checkbox"/>                                                                     | <input type="checkbox"/>                                                                                       | <input type="checkbox"/>                                        | <input type="checkbox"/>           | <input checked="" type="checkbox"/>                              | <input type="checkbox"/>                            | Within past 2 years. |
| BARRX Medical, Inc.                      | <input type="checkbox"/>                                                                    | <input type="checkbox"/>                                                                     | <input type="checkbox"/>                                                                                       | <input type="checkbox"/>                                        | <input type="checkbox"/>           | <input checked="" type="checkbox"/>                              | <input type="checkbox"/>                            | Within past 2 years. |
| Baxter                                   | <input type="checkbox"/>                                                                    | <input type="checkbox"/>                                                                     | <input checked="" type="checkbox"/>                                                                            | <input type="checkbox"/>                                        | <input type="checkbox"/>           | <input checked="" type="checkbox"/>                              | <input type="checkbox"/>                            | Within past 2 years. |
| Bayer AG                                 | <input type="checkbox"/>                                                                    | <input type="checkbox"/>                                                                     | <input checked="" type="checkbox"/>                                                                            | <input type="checkbox"/>                                        | <input type="checkbox"/>           | <input checked="" type="checkbox"/>                              | <input type="checkbox"/>                            | Within past 2 years. |
| Bayer Corporation US                     | <input type="checkbox"/>                                                                    | <input type="checkbox"/>                                                                     | <input type="checkbox"/>                                                                                       | <input type="checkbox"/>                                        | <input type="checkbox"/>           | <input checked="" type="checkbox"/>                              | <input type="checkbox"/>                            | Within past 2 years. |
| Bayer in Japan                           | <input type="checkbox"/>                                                                    | <input type="checkbox"/>                                                                     | <input type="checkbox"/>                                                                                       | <input type="checkbox"/>                                        | <input type="checkbox"/>           | <input checked="" type="checkbox"/>                              | <input type="checkbox"/>                            | Within past 2 years. |
| Berlex, Inc.                             | <input type="checkbox"/>                                                                    | <input type="checkbox"/>                                                                     | <input type="checkbox"/>                                                                                       | <input type="checkbox"/>                                        | <input type="checkbox"/>           | <input checked="" type="checkbox"/>                              | <input type="checkbox"/>                            | Within past 2 years. |
| Bioheart                                 | <input type="checkbox"/>                                                                    | <input type="checkbox"/>                                                                     | <input type="checkbox"/>                                                                                       | <input type="checkbox"/>                                        | <input type="checkbox"/>           | <input checked="" type="checkbox"/>                              | <input type="checkbox"/>                            | Within past 2 years. |
| Biolex Therapeutics                      | <input type="checkbox"/>                                                                    | <input type="checkbox"/>                                                                     | <input type="checkbox"/>                                                                                       | <input type="checkbox"/>                                        | <input type="checkbox"/>           | <input checked="" type="checkbox"/>                              | <input type="checkbox"/>                            | Within past 2 years. |
| Biosense Webster, Inc.                   | <input type="checkbox"/>                                                                    | <input type="checkbox"/>                                                                     | <input type="checkbox"/>                                                                                       | <input type="checkbox"/>                                        | <input type="checkbox"/>           | <input checked="" type="checkbox"/>                              | <input type="checkbox"/>                            | Within past 2 years. |
| Biosite, Inc. (also Biosite Diagnostics) | <input type="checkbox"/>                                                                    | <input type="checkbox"/>                                                                     | <input type="checkbox"/>                                                                                       | <input type="checkbox"/>                                        | <input type="checkbox"/>           | <input checked="" type="checkbox"/>                              | <input type="checkbox"/>                            | Within past 2 years. |
| Biosynexus                               | <input type="checkbox"/>                                                                    | <input type="checkbox"/>                                                                     | <input type="checkbox"/>                                                                                       | <input type="checkbox"/>                                        | <input type="checkbox"/>           | <input checked="" type="checkbox"/>                              | <input type="checkbox"/>                            | Within past 2 years. |
| Boehringer Ingelheim                     | <input type="checkbox"/>                                                                    | <input type="checkbox"/>                                                                     | <input type="checkbox"/>                                                                                       | <input type="checkbox"/>                                        | <input type="checkbox"/>           | <input checked="" type="checkbox"/>                              | <input type="checkbox"/>                            | Within past 2 years. |
| Boehringer Mannheim                      | <input type="checkbox"/>                                                                    | <input type="checkbox"/>                                                                     | <input type="checkbox"/>                                                                                       | <input type="checkbox"/>                                        | <input type="checkbox"/>           | <input checked="" type="checkbox"/>                              | <input type="checkbox"/>                            | Within past 2 years. |
| Boston MedTech Advisors                  | <input type="checkbox"/>                                                                    | <input type="checkbox"/>                                                                     | <input type="checkbox"/>                                                                                       | <input type="checkbox"/>                                        | <input type="checkbox"/>           | <input checked="" type="checkbox"/>                              | <input type="checkbox"/>                            | Within past 2 years. |

| Company                       | (1) A research grant or contract from this company partially supports my university salary. | (2) Educational activities or lectures for this company generate revenue for the university. | (3) Consulting or other services (including CME and other non-CME) for this company generates personal income. | (4) I receive significant personal royalties from this company. | (5) I have equity in this company. | (6) This company has a research grant or contract with the DCRI. | (7) This company provides support for DCRI fellows. | Comments             |
|-------------------------------|---------------------------------------------------------------------------------------------|----------------------------------------------------------------------------------------------|----------------------------------------------------------------------------------------------------------------|-----------------------------------------------------------------|------------------------------------|------------------------------------------------------------------|-----------------------------------------------------|----------------------|
| Boston Scientific Corporation | <input type="checkbox"/>                                                                    | <input type="checkbox"/>                                                                     | <input type="checkbox"/>                                                                                       | <input type="checkbox"/>                                        | <input type="checkbox"/>           | <input checked="" type="checkbox"/>                              | <input type="checkbox"/>                            | Within past 2 years. |
| Bristol Myers Squibb          | <input checked="" type="checkbox"/>                                                         | <input type="checkbox"/>                                                                     | <input checked="" type="checkbox"/>                                                                            | <input type="checkbox"/>                                        | <input type="checkbox"/>           | <input checked="" type="checkbox"/>                              | <input type="checkbox"/>                            | Within past 2 years. |
| Cadence Pharmaceuticals, Inc. | <input type="checkbox"/>                                                                    | <input type="checkbox"/>                                                                     | <input type="checkbox"/>                                                                                       | <input type="checkbox"/>                                        | <input type="checkbox"/>           | <input checked="" type="checkbox"/>                              | <input type="checkbox"/>                            | Within past 2 years. |
| CanAm Bioresearch             | <input type="checkbox"/>                                                                    | <input type="checkbox"/>                                                                     | <input type="checkbox"/>                                                                                       | <input type="checkbox"/>                                        | <input type="checkbox"/>           | <input checked="" type="checkbox"/>                              | <input checked="" type="checkbox"/>                 | Within past 2 years. |
| Cardio Thoracic Systems       | <input type="checkbox"/>                                                                    | <input type="checkbox"/>                                                                     | <input type="checkbox"/>                                                                                       | <input type="checkbox"/>                                        | <input type="checkbox"/>           | <input checked="" type="checkbox"/>                              | <input type="checkbox"/>                            | Within past 2 years. |
| CardioDynamics International  | <input type="checkbox"/>                                                                    | <input type="checkbox"/>                                                                     | <input type="checkbox"/>                                                                                       | <input type="checkbox"/>                                        | <input type="checkbox"/>           | <input checked="" type="checkbox"/>                              | <input type="checkbox"/>                            | Within past 2 years. |
| CardioKinetix                 | <input type="checkbox"/>                                                                    | <input type="checkbox"/>                                                                     | <input type="checkbox"/>                                                                                       | <input type="checkbox"/>                                        | <input type="checkbox"/>           | <input checked="" type="checkbox"/>                              | <input type="checkbox"/>                            | Within past 2 years. |
| CardioOptics                  | <input type="checkbox"/>                                                                    | <input type="checkbox"/>                                                                     | <input type="checkbox"/>                                                                                       | <input type="checkbox"/>                                        | <input type="checkbox"/>           | <input checked="" type="checkbox"/>                              | <input type="checkbox"/>                            | Within past 2 years. |
| Celgene Corporation           | <input type="checkbox"/>                                                                    | <input type="checkbox"/>                                                                     | <input type="checkbox"/>                                                                                       | <input type="checkbox"/>                                        | <input type="checkbox"/>           | <input checked="" type="checkbox"/>                              | <input type="checkbox"/>                            | Within past 2 years. |
| Celsion Corporation           | <input type="checkbox"/>                                                                    | <input type="checkbox"/>                                                                     | <input type="checkbox"/>                                                                                       | <input type="checkbox"/>                                        | <input type="checkbox"/>           | <input checked="" type="checkbox"/>                              | <input type="checkbox"/>                            | Within past 2 years. |
| Cempra Pharmacuticals, Inc.   | <input type="checkbox"/>                                                                    | <input type="checkbox"/>                                                                     | <input type="checkbox"/>                                                                                       | <input type="checkbox"/>                                        | <input type="checkbox"/>           | <input checked="" type="checkbox"/>                              | <input type="checkbox"/>                            | Within past 2 years. |
| Centocor                      | <input type="checkbox"/>                                                                    | <input type="checkbox"/>                                                                     | <input type="checkbox"/>                                                                                       | <input type="checkbox"/>                                        | <input type="checkbox"/>           | <input checked="" type="checkbox"/>                              | <input type="checkbox"/>                            | Within past 2 years. |
| Cerexa, Inc.                  | <input type="checkbox"/>                                                                    | <input type="checkbox"/>                                                                     | <input type="checkbox"/>                                                                                       | <input type="checkbox"/>                                        | <input type="checkbox"/>           | <input checked="" type="checkbox"/>                              | <input type="checkbox"/>                            | Within past 2 years. |
| Chase Medical                 | <input type="checkbox"/>                                                                    | <input type="checkbox"/>                                                                     | <input type="checkbox"/>                                                                                       | <input type="checkbox"/>                                        | <input type="checkbox"/>           | <input checked="" type="checkbox"/>                              | <input type="checkbox"/>                            | Within past 2 years. |
| Chugai Pharmaceutical         | <input type="checkbox"/>                                                                    | <input type="checkbox"/>                                                                     | <input type="checkbox"/>                                                                                       | <input type="checkbox"/>                                        | <input type="checkbox"/>           | <input checked="" type="checkbox"/>                              | <input type="checkbox"/>                            | Within past 2 years. |
| Cierra Inc.                   | <input type="checkbox"/>                                                                    | <input type="checkbox"/>                                                                     | <input type="checkbox"/>                                                                                       | <input type="checkbox"/>                                        | <input type="checkbox"/>           | <input checked="" type="checkbox"/>                              | <input type="checkbox"/>                            | Within past 2 years. |
| Coley Pharmaceutical Group    | <input type="checkbox"/>                                                                    | <input type="checkbox"/>                                                                     | <input type="checkbox"/>                                                                                       | <input type="checkbox"/>                                        | <input type="checkbox"/>           | <input checked="" type="checkbox"/>                              | <input type="checkbox"/>                            | Within past 2 years. |
| Conor Medsystems              | <input type="checkbox"/>                                                                    | <input type="checkbox"/>                                                                     | <input type="checkbox"/>                                                                                       | <input type="checkbox"/>                                        | <input type="checkbox"/>           | <input checked="" type="checkbox"/>                              | <input type="checkbox"/>                            | Within past 2 years. |
| Corautus Genetics             | <input type="checkbox"/>                                                                    | <input type="checkbox"/>                                                                     | <input type="checkbox"/>                                                                                       | <input type="checkbox"/>                                        | <input type="checkbox"/>           | <input checked="" type="checkbox"/>                              | <input type="checkbox"/>                            | Within past 2 years. |
| Cordis                        | <input type="checkbox"/>                                                                    | <input type="checkbox"/>                                                                     | <input type="checkbox"/>                                                                                       | <input type="checkbox"/>                                        | <input type="checkbox"/>           | <input checked="" type="checkbox"/>                              | <input type="checkbox"/>                            | Within past 2 years. |
| Critical Therapeutics         | <input type="checkbox"/>                                                                    | <input type="checkbox"/>                                                                     | <input type="checkbox"/>                                                                                       | <input type="checkbox"/>                                        | <input type="checkbox"/>           | <input checked="" type="checkbox"/>                              | <input type="checkbox"/>                            | Within past 2 years. |

| Company                       | (1) A research grant or contract from this company partially supports my university salary. | (2) Educational activities or lectures for this company generate revenue for the university. | (3) Consulting or other services (including CME and other non-CME) for this company generates personal income. | (4) I receive significant personal royalties from this company. | (5) I have equity in this company. | (6) This company has a research grant or contract with the DCRI. | (7) This company provides support for DCRI fellows. | Comments             |
|-------------------------------|---------------------------------------------------------------------------------------------|----------------------------------------------------------------------------------------------|----------------------------------------------------------------------------------------------------------------|-----------------------------------------------------------------|------------------------------------|------------------------------------------------------------------|-----------------------------------------------------|----------------------|
| Cubist Pharmaceuticals        | <input type="checkbox"/>                                                                    | <input type="checkbox"/>                                                                     | <input type="checkbox"/>                                                                                       | <input type="checkbox"/>                                        | <input type="checkbox"/>           | <input checked="" type="checkbox"/>                              | <input type="checkbox"/>                            | Within past 2 years. |
| CV Therapeutics, Inc.         | <input type="checkbox"/>                                                                    | <input type="checkbox"/>                                                                     | <input type="checkbox"/>                                                                                       | <input type="checkbox"/>                                        | <input type="checkbox"/>           | <input checked="" type="checkbox"/>                              | <input type="checkbox"/>                            | Within past 2 years. |
| Cytokinetics                  | <input type="checkbox"/>                                                                    | <input type="checkbox"/>                                                                     | <input type="checkbox"/>                                                                                       | <input type="checkbox"/>                                        | <input type="checkbox"/>           | <input checked="" type="checkbox"/>                              | <input type="checkbox"/>                            | Within past 2 years. |
| Daiichi Sankyo                | <input type="checkbox"/>                                                                    | <input type="checkbox"/>                                                                     | <input type="checkbox"/>                                                                                       | <input type="checkbox"/>                                        | <input type="checkbox"/>           | <input checked="" type="checkbox"/>                              | <input type="checkbox"/>                            | Within past 2 years. |
| Datascope                     | <input type="checkbox"/>                                                                    | <input type="checkbox"/>                                                                     | <input type="checkbox"/>                                                                                       | <input type="checkbox"/>                                        | <input type="checkbox"/>           | <input checked="" type="checkbox"/>                              | <input type="checkbox"/>                            | Within past 2 years. |
| deCode Genetics               | <input type="checkbox"/>                                                                    | <input type="checkbox"/>                                                                     | <input type="checkbox"/>                                                                                       | <input type="checkbox"/>                                        | <input type="checkbox"/>           | <input checked="" type="checkbox"/>                              | <input type="checkbox"/>                            | Within past 2 years. |
| Dyax                          | <input type="checkbox"/>                                                                    | <input type="checkbox"/>                                                                     | <input type="checkbox"/>                                                                                       | <input type="checkbox"/>                                        | <input type="checkbox"/>           | <input checked="" type="checkbox"/>                              | <input type="checkbox"/>                            | Within past 2 years. |
| Echosens, Inc.                | <input type="checkbox"/>                                                                    | <input type="checkbox"/>                                                                     | <input type="checkbox"/>                                                                                       | <input type="checkbox"/>                                        | <input type="checkbox"/>           | <input checked="" type="checkbox"/>                              | <input type="checkbox"/>                            | Within past 2 years. |
| Eclipse Surgical Technologies | <input type="checkbox"/>                                                                    | <input type="checkbox"/>                                                                     | <input type="checkbox"/>                                                                                       | <input type="checkbox"/>                                        | <input type="checkbox"/>           | <input checked="" type="checkbox"/>                              | <input type="checkbox"/>                            | Within past 2 years. |
| Edwards Lifesciences          | <input type="checkbox"/>                                                                    | <input type="checkbox"/>                                                                     | <input type="checkbox"/>                                                                                       | <input type="checkbox"/>                                        | <input type="checkbox"/>           | <input checked="" type="checkbox"/>                              | <input type="checkbox"/>                            | Within past 2 years. |
| Eli Lilly & Company           | <input type="checkbox"/>                                                                    | <input type="checkbox"/>                                                                     | <input type="checkbox"/>                                                                                       | <input type="checkbox"/>                                        | <input type="checkbox"/>           | <input checked="" type="checkbox"/>                              | <input type="checkbox"/>                            | Within past 2 years. |
| EnteroMedics                  | <input type="checkbox"/>                                                                    | <input type="checkbox"/>                                                                     | <input type="checkbox"/>                                                                                       | <input type="checkbox"/>                                        | <input type="checkbox"/>           | <input checked="" type="checkbox"/>                              | <input type="checkbox"/>                            | Within past 2 years. |
| Enzon Pharmaceutical          | <input type="checkbox"/>                                                                    | <input type="checkbox"/>                                                                     | <input type="checkbox"/>                                                                                       | <input type="checkbox"/>                                        | <input type="checkbox"/>           | <input checked="" type="checkbox"/>                              | <input type="checkbox"/>                            | Within past 2 years. |
| EOS Electro Optical Systems   | <input type="checkbox"/>                                                                    | <input type="checkbox"/>                                                                     | <input type="checkbox"/>                                                                                       | <input type="checkbox"/>                                        | <input type="checkbox"/>           | <input checked="" type="checkbox"/>                              | <input type="checkbox"/>                            | Within past 2 years. |
| EPI-Q, Inc.                   | <input type="checkbox"/>                                                                    | <input type="checkbox"/>                                                                     | <input type="checkbox"/>                                                                                       | <input type="checkbox"/>                                        | <input type="checkbox"/>           | <input checked="" type="checkbox"/>                              | <input type="checkbox"/>                            | Within past 2 years. |
| ev3, Inc.                     | <input type="checkbox"/>                                                                    | <input type="checkbox"/>                                                                     | <input type="checkbox"/>                                                                                       | <input type="checkbox"/>                                        | <input type="checkbox"/>           | <input checked="" type="checkbox"/>                              | <input type="checkbox"/>                            | Within past 2 years. |
| Evalve, Inc.                  | <input type="checkbox"/>                                                                    | <input type="checkbox"/>                                                                     | <input type="checkbox"/>                                                                                       | <input type="checkbox"/>                                        | <input type="checkbox"/>           | <input checked="" type="checkbox"/>                              | <input type="checkbox"/>                            | Within past 2 years. |
| Flow Cardia Inc.              | <input type="checkbox"/>                                                                    | <input type="checkbox"/>                                                                     | <input type="checkbox"/>                                                                                       | <input type="checkbox"/>                                        | <input type="checkbox"/>           | <input checked="" type="checkbox"/>                              | <input type="checkbox"/>                            | Within past 2 years. |
| Fox Hollow Pharmaceuticals    | <input type="checkbox"/>                                                                    | <input type="checkbox"/>                                                                     | <input type="checkbox"/>                                                                                       | <input type="checkbox"/>                                        | <input type="checkbox"/>           | <input checked="" type="checkbox"/>                              | <input type="checkbox"/>                            | Within past 2 years. |
| Fujisawa                      | <input type="checkbox"/>                                                                    | <input type="checkbox"/>                                                                     | <input type="checkbox"/>                                                                                       | <input type="checkbox"/>                                        | <input type="checkbox"/>           | <input checked="" type="checkbox"/>                              | <input type="checkbox"/>                            | Within past 2 years. |
| Genentech                     | <input type="checkbox"/>                                                                    | <input type="checkbox"/>                                                                     | <input type="checkbox"/>                                                                                       | <input type="checkbox"/>                                        | <input type="checkbox"/>           | <input checked="" type="checkbox"/>                              | <input type="checkbox"/>                            | Within past 2 years. |
| General Electric Company      | <input type="checkbox"/>                                                                    | <input type="checkbox"/>                                                                     | <input type="checkbox"/>                                                                                       | <input type="checkbox"/>                                        | <input type="checkbox"/>           | <input checked="" type="checkbox"/>                              | <input type="checkbox"/>                            | Within past 2 years. |
| General Electric              | <input type="checkbox"/>                                                                    | <input type="checkbox"/>                                                                     | <input type="checkbox"/>                                                                                       | <input type="checkbox"/>                                        | <input type="checkbox"/>           | <input checked="" type="checkbox"/>                              | <input type="checkbox"/>                            | Within past 2 years. |

| Company                          | (1) A research grant or contract from this company partially supports my university salary. | (2) Educational activities or lectures for this company generate revenue for the university. | (3) Consulting or other services (including CME and other non-CME) for this company generates personal income. | (4) I receive significant personal royalties from this company. | (5) I have equity in this company. | (6) This company has a research grant or contract with the DCRI. | (7) This company provides support for DCRI fellows. | Comments             |
|----------------------------------|---------------------------------------------------------------------------------------------|----------------------------------------------------------------------------------------------|----------------------------------------------------------------------------------------------------------------|-----------------------------------------------------------------|------------------------------------|------------------------------------------------------------------|-----------------------------------------------------|----------------------|
| Healthcare                       |                                                                                             |                                                                                              |                                                                                                                |                                                                 |                                    |                                                                  |                                                     |                      |
| General Electric Medical Systems | <input type="checkbox"/>                                                                    | <input type="checkbox"/>                                                                     | <input type="checkbox"/>                                                                                       | <input type="checkbox"/>                                        | <input type="checkbox"/>           | <input checked="" type="checkbox"/>                              | <input type="checkbox"/>                            | Within past 2 years. |
| Genzyme Corporation              | <input type="checkbox"/>                                                                    | <input type="checkbox"/>                                                                     | <input type="checkbox"/>                                                                                       | <input type="checkbox"/>                                        | <input type="checkbox"/>           | <input checked="" type="checkbox"/>                              | <input type="checkbox"/>                            | Within past 2 years. |
| Getz Bros. & Co., Inc.           | <input type="checkbox"/>                                                                    | <input type="checkbox"/>                                                                     | <input type="checkbox"/>                                                                                       | <input type="checkbox"/>                                        | <input type="checkbox"/>           | <input checked="" type="checkbox"/>                              | <input type="checkbox"/>                            | Within past 2 years. |
| Glaxo SmithKline                 | <input type="checkbox"/>                                                                    | <input type="checkbox"/>                                                                     | <input type="checkbox"/>                                                                                       | <input type="checkbox"/>                                        | <input type="checkbox"/>           | <input checked="" type="checkbox"/>                              | <input type="checkbox"/>                            | Within past 2 years. |
| Globelmmune                      | <input type="checkbox"/>                                                                    | <input type="checkbox"/>                                                                     | <input type="checkbox"/>                                                                                       | <input type="checkbox"/>                                        | <input type="checkbox"/>           | <input checked="" type="checkbox"/>                              | <input type="checkbox"/>                            | Within past 2 years. |
| Gloucester Pharmaceuticals       | <input type="checkbox"/>                                                                    | <input type="checkbox"/>                                                                     | <input type="checkbox"/>                                                                                       | <input type="checkbox"/>                                        | <input type="checkbox"/>           | <input checked="" type="checkbox"/>                              | <input type="checkbox"/>                            | Within past 2 years. |
| Guidant Corporation              | <input type="checkbox"/>                                                                    | <input type="checkbox"/>                                                                     | <input type="checkbox"/>                                                                                       | <input type="checkbox"/>                                        | <input type="checkbox"/>           | <input checked="" type="checkbox"/>                              | <input type="checkbox"/>                            | Within past 2 years. |
| Guilford Pharmaceuticals         | <input type="checkbox"/>                                                                    | <input type="checkbox"/>                                                                     | <input type="checkbox"/>                                                                                       | <input type="checkbox"/>                                        | <input type="checkbox"/>           | <input checked="" type="checkbox"/>                              | <input type="checkbox"/>                            | Within past 2 years. |
| Heartscape Technologies          | <input type="checkbox"/>                                                                    | <input type="checkbox"/>                                                                     | <input type="checkbox"/>                                                                                       | <input type="checkbox"/>                                        | <input type="checkbox"/>           | <input checked="" type="checkbox"/>                              | <input type="checkbox"/>                            | Within past 2 years. |
| Hoffmann-La Roche                | <input type="checkbox"/>                                                                    | <input type="checkbox"/>                                                                     | <input type="checkbox"/>                                                                                       | <input type="checkbox"/>                                        | <input type="checkbox"/>           | <input checked="" type="checkbox"/>                              | <input type="checkbox"/>                            | Within past 2 years. |
| Human Genome Sciences, Inc.      | <input type="checkbox"/>                                                                    | <input type="checkbox"/>                                                                     | <input type="checkbox"/>                                                                                       | <input type="checkbox"/>                                        | <input type="checkbox"/>           | <input checked="" type="checkbox"/>                              | <input type="checkbox"/>                            | Within past 2 years. |
| ICAGEN                           | <input type="checkbox"/>                                                                    | <input type="checkbox"/>                                                                     | <input type="checkbox"/>                                                                                       | <input type="checkbox"/>                                        | <input type="checkbox"/>           | <input checked="" type="checkbox"/>                              | <input type="checkbox"/>                            | Within past 2 years. |
| iCo Therapeutics                 | <input type="checkbox"/>                                                                    | <input type="checkbox"/>                                                                     | <input type="checkbox"/>                                                                                       | <input type="checkbox"/>                                        | <input type="checkbox"/>           | <input checked="" type="checkbox"/>                              | <input type="checkbox"/>                            | Within past 2 years. |
| IDB Medical                      | <input type="checkbox"/>                                                                    | <input type="checkbox"/>                                                                     | <input type="checkbox"/>                                                                                       | <input type="checkbox"/>                                        | <input type="checkbox"/>           | <input checked="" type="checkbox"/>                              | <input type="checkbox"/>                            | Within past 2 years. |
| Idenix Pharmaceuticals           | <input type="checkbox"/>                                                                    | <input type="checkbox"/>                                                                     | <input type="checkbox"/>                                                                                       | <input type="checkbox"/>                                        | <input type="checkbox"/>           | <input checked="" type="checkbox"/>                              | <input type="checkbox"/>                            | Within past 2 years. |
| Idera Pharmaceutical             | <input type="checkbox"/>                                                                    | <input type="checkbox"/>                                                                     | <input type="checkbox"/>                                                                                       | <input type="checkbox"/>                                        | <input type="checkbox"/>           | <input checked="" type="checkbox"/>                              | <input type="checkbox"/>                            | Within past 2 years. |
| Indigo Pharmaceuticals           | <input type="checkbox"/>                                                                    | <input type="checkbox"/>                                                                     | <input checked="" type="checkbox"/>                                                                            | <input type="checkbox"/>                                        | <input type="checkbox"/>           | <input type="checkbox"/>                                         | <input type="checkbox"/>                            | Within past 2 years. |
| Infacare Pharmaceutical          | <input type="checkbox"/>                                                                    | <input type="checkbox"/>                                                                     | <input type="checkbox"/>                                                                                       | <input type="checkbox"/>                                        | <input type="checkbox"/>           | <input checked="" type="checkbox"/>                              | <input type="checkbox"/>                            | Within past 2 years. |
| INFORMD, Inc.                    | <input type="checkbox"/>                                                                    | <input type="checkbox"/>                                                                     | <input type="checkbox"/>                                                                                       | <input type="checkbox"/>                                        | <input type="checkbox"/>           | <input checked="" type="checkbox"/>                              | <input type="checkbox"/>                            | Within past 2 years. |
| InfraReDx                        | <input type="checkbox"/>                                                                    | <input type="checkbox"/>                                                                     | <input type="checkbox"/>                                                                                       | <input type="checkbox"/>                                        | <input type="checkbox"/>           | <input checked="" type="checkbox"/>                              | <input type="checkbox"/>                            | Within past 2 years. |
| Inhibitex                        | <input type="checkbox"/>                                                                    | <input type="checkbox"/>                                                                     | <input type="checkbox"/>                                                                                       | <input type="checkbox"/>                                        | <input type="checkbox"/>           | <input checked="" type="checkbox"/>                              | <input type="checkbox"/>                            | Within past 2 years. |
| Innocoll Pharmaceuticals         | <input type="checkbox"/>                                                                    | <input type="checkbox"/>                                                                     | <input type="checkbox"/>                                                                                       | <input type="checkbox"/>                                        | <input type="checkbox"/>           | <input checked="" type="checkbox"/>                              | <input type="checkbox"/>                            | Within past 2 years. |

| Company                            | (1) A research grant or contract from this company partially supports my university salary. | (2) Educational activities or lectures for this company generate revenue for the university. | (3) Consulting or other services (including CME and other non-CME) for this company generates personal income. | (4) I receive significant personal royalties from this company. | (5) I have equity in this company. | (6) This company has a research grant or contract with the DCRI. | (7) This company provides support for DCRI fellows. | Comments             |
|------------------------------------|---------------------------------------------------------------------------------------------|----------------------------------------------------------------------------------------------|----------------------------------------------------------------------------------------------------------------|-----------------------------------------------------------------|------------------------------------|------------------------------------------------------------------|-----------------------------------------------------|----------------------|
| Inspire Pharmaceuticals            | <input type="checkbox"/>                                                                    | <input type="checkbox"/>                                                                     | <input type="checkbox"/>                                                                                       | <input type="checkbox"/>                                        | <input type="checkbox"/>           | <input checked="" type="checkbox"/>                              | <input type="checkbox"/>                            | Within past 2 years. |
| Intarcia Therapeutics              | <input type="checkbox"/>                                                                    | <input type="checkbox"/>                                                                     | <input type="checkbox"/>                                                                                       | <input type="checkbox"/>                                        | <input type="checkbox"/>           | <input checked="" type="checkbox"/>                              | <input type="checkbox"/>                            | Within past 2 years. |
| Integrated Therapeutics Group      | <input type="checkbox"/>                                                                    | <input type="checkbox"/>                                                                     | <input type="checkbox"/>                                                                                       | <input type="checkbox"/>                                        | <input type="checkbox"/>           | <input checked="" type="checkbox"/>                              | <input type="checkbox"/>                            | Within past 2 years. |
| InterMune Pharmaceuticals, Inc.    | <input type="checkbox"/>                                                                    | <input type="checkbox"/>                                                                     | <input type="checkbox"/>                                                                                       | <input type="checkbox"/>                                        | <input type="checkbox"/>           | <input checked="" type="checkbox"/>                              | <input type="checkbox"/>                            | Within past 2 years. |
| Inverness Medical Innovations      | <input type="checkbox"/>                                                                    | <input type="checkbox"/>                                                                     | <input type="checkbox"/>                                                                                       | <input type="checkbox"/>                                        | <input type="checkbox"/>           | <input checked="" type="checkbox"/>                              | <input type="checkbox"/>                            | Within past 2 years. |
| Ischemix, Inc.                     | <input type="checkbox"/>                                                                    | <input type="checkbox"/>                                                                     | <input type="checkbox"/>                                                                                       | <input type="checkbox"/>                                        | <input type="checkbox"/>           | <input checked="" type="checkbox"/>                              | <input type="checkbox"/>                            | Within past 2 years. |
| Johnson & Johnson                  | <input type="checkbox"/>                                                                    | <input type="checkbox"/>                                                                     | <input type="checkbox"/>                                                                                       | <input type="checkbox"/>                                        | <input type="checkbox"/>           | <input checked="" type="checkbox"/>                              | <input checked="" type="checkbox"/>                 | Within past 2 years. |
| Jomed, Inc.                        | <input type="checkbox"/>                                                                    | <input type="checkbox"/>                                                                     | <input type="checkbox"/>                                                                                       | <input type="checkbox"/>                                        | <input type="checkbox"/>           | <input checked="" type="checkbox"/>                              | <input type="checkbox"/>                            | Within past 2 years. |
| KAI Pharmaceuticals                | <input checked="" type="checkbox"/>                                                         | <input type="checkbox"/>                                                                     | <input type="checkbox"/>                                                                                       | <input type="checkbox"/>                                        | <input type="checkbox"/>           | <input checked="" type="checkbox"/>                              | <input type="checkbox"/>                            | Within past 2 years. |
| Kerberos Proximal Solutions, Inc.  | <input type="checkbox"/>                                                                    | <input type="checkbox"/>                                                                     | <input type="checkbox"/>                                                                                       | <input type="checkbox"/>                                        | <input type="checkbox"/>           | <input checked="" type="checkbox"/>                              | <input type="checkbox"/>                            | Within past 2 years. |
| Kinetic Concepts, Inc.             | <input type="checkbox"/>                                                                    | <input type="checkbox"/>                                                                     | <input type="checkbox"/>                                                                                       | <input type="checkbox"/>                                        | <input type="checkbox"/>           | <input checked="" type="checkbox"/>                              | <input type="checkbox"/>                            | Within past 2 years. |
| King Pharmaceuticals               | <input type="checkbox"/>                                                                    | <input type="checkbox"/>                                                                     | <input type="checkbox"/>                                                                                       | <input type="checkbox"/>                                        | <input type="checkbox"/>           | <input checked="" type="checkbox"/>                              | <input type="checkbox"/>                            | Within past 2 years. |
| Kureha Corp.                       | <input type="checkbox"/>                                                                    | <input type="checkbox"/>                                                                     | <input type="checkbox"/>                                                                                       | <input type="checkbox"/>                                        | <input type="checkbox"/>           | <input checked="" type="checkbox"/>                              | <input type="checkbox"/>                            | Within past 2 years. |
| Lilly                              | <input type="checkbox"/>                                                                    | <input type="checkbox"/>                                                                     | <input type="checkbox"/>                                                                                       | <input type="checkbox"/>                                        | <input type="checkbox"/>           | <input checked="" type="checkbox"/>                              | <input type="checkbox"/>                            | Within past 2 years. |
| Lumen Biomedical, Inc.             | <input type="checkbox"/>                                                                    | <input type="checkbox"/>                                                                     | <input type="checkbox"/>                                                                                       | <input type="checkbox"/>                                        | <input type="checkbox"/>           | <input checked="" type="checkbox"/>                              | <input type="checkbox"/>                            | Within past 2 years. |
| Medical Educations Solutions Group | <input type="checkbox"/>                                                                    | <input type="checkbox"/>                                                                     | <input type="checkbox"/>                                                                                       | <input type="checkbox"/>                                        | <input type="checkbox"/>           | <input checked="" type="checkbox"/>                              | <input type="checkbox"/>                            | Within past 2 years. |
| Medicure                           | <input checked="" type="checkbox"/>                                                         | <input type="checkbox"/>                                                                     | <input type="checkbox"/>                                                                                       | <input type="checkbox"/>                                        | <input type="checkbox"/>           | <input checked="" type="checkbox"/>                              | <input type="checkbox"/>                            | Within past 2 years. |
| Medicure International             | <input type="checkbox"/>                                                                    | <input type="checkbox"/>                                                                     | <input type="checkbox"/>                                                                                       | <input type="checkbox"/>                                        | <input type="checkbox"/>           | <input checked="" type="checkbox"/>                              | <input type="checkbox"/>                            | Within past 2 years. |
| Medicure MiniMed                   | <input type="checkbox"/>                                                                    | <input type="checkbox"/>                                                                     | <input type="checkbox"/>                                                                                       | <input type="checkbox"/>                                        | <input type="checkbox"/>           | <input checked="" type="checkbox"/>                              | <input type="checkbox"/>                            | Within past 2 years. |
| Medi-Flex, Inc.                    | <input type="checkbox"/>                                                                    | <input type="checkbox"/>                                                                     | <input type="checkbox"/>                                                                                       | <input type="checkbox"/>                                        | <input type="checkbox"/>           | <input checked="" type="checkbox"/>                              | <input type="checkbox"/>                            | Within past 2 years. |
| MedImmune                          | <input type="checkbox"/>                                                                    | <input type="checkbox"/>                                                                     | <input type="checkbox"/>                                                                                       | <input type="checkbox"/>                                        | <input type="checkbox"/>           | <input checked="" type="checkbox"/>                              | <input type="checkbox"/>                            | Within past 2 years. |

| Company                     | (1) A research grant or contract from this company partially supports my university salary. | (2) Educational activities or lectures for this company generate revenue for the university. | (3) Consulting or other services (including CME and other non-CME) for this company generates personal income. | (4) I receive significant personal royalties from this company. | (5) I have equity in this company. | (6) This company has a research grant or contract with the DCRI. | (7) This company provides support for DCRI fellows. | Comments             |
|-----------------------------|---------------------------------------------------------------------------------------------|----------------------------------------------------------------------------------------------|----------------------------------------------------------------------------------------------------------------|-----------------------------------------------------------------|------------------------------------|------------------------------------------------------------------|-----------------------------------------------------|----------------------|
| Medtronic AVE               | <input type="checkbox"/>                                                                    | <input type="checkbox"/>                                                                     | <input type="checkbox"/>                                                                                       | <input type="checkbox"/>                                        | <input type="checkbox"/>           | <input checked="" type="checkbox"/>                              | <input type="checkbox"/>                            | Within past 2 years. |
| Medtronic Diabetes          | <input type="checkbox"/>                                                                    | <input type="checkbox"/>                                                                     | <input type="checkbox"/>                                                                                       | <input type="checkbox"/>                                        | <input type="checkbox"/>           | <input checked="" type="checkbox"/>                              | <input type="checkbox"/>                            | Within past 2 years. |
| Medtronic, Inc.             | <input type="checkbox"/>                                                                    | <input type="checkbox"/>                                                                     | <input type="checkbox"/>                                                                                       | <input type="checkbox"/>                                        | <input type="checkbox"/>           | <input checked="" type="checkbox"/>                              | <input type="checkbox"/>                            | Within past 2 years. |
| Medtronic Vascular          | <input type="checkbox"/>                                                                    | <input type="checkbox"/>                                                                     | <input type="checkbox"/>                                                                                       | <input type="checkbox"/>                                        | <input type="checkbox"/>           | <input checked="" type="checkbox"/>                              | <input type="checkbox"/>                            | Within past 2 years. |
| Merck Group                 | <input checked="" type="checkbox"/>                                                         | <input type="checkbox"/>                                                                     | <input type="checkbox"/>                                                                                       | <input type="checkbox"/>                                        | <input type="checkbox"/>           | <input checked="" type="checkbox"/>                              | <input checked="" type="checkbox"/>                 | Within past 2 years. |
| Microphage, Inc.            | <input type="checkbox"/>                                                                    | <input type="checkbox"/>                                                                     | <input type="checkbox"/>                                                                                       | <input type="checkbox"/>                                        | <input type="checkbox"/>           | <input checked="" type="checkbox"/>                              | <input type="checkbox"/>                            | Within past 2 years. |
| Millennium Pharmaceutical   | <input checked="" type="checkbox"/>                                                         | <input type="checkbox"/>                                                                     | <input type="checkbox"/>                                                                                       | <input type="checkbox"/>                                        | <input type="checkbox"/>           | <input checked="" type="checkbox"/>                              | <input type="checkbox"/>                            | Within past 2 years. |
| Momenta Pharmaceutical      | <input type="checkbox"/>                                                                    | <input type="checkbox"/>                                                                     | <input type="checkbox"/>                                                                                       | <input type="checkbox"/>                                        | <input type="checkbox"/>           | <input checked="" type="checkbox"/>                              | <input type="checkbox"/>                            | Within past 2 years. |
| Mosby                       | <input type="checkbox"/>                                                                    | <input type="checkbox"/>                                                                     | <input type="checkbox"/>                                                                                       | <input type="checkbox"/>                                        | <input type="checkbox"/>           | <input checked="" type="checkbox"/>                              | <input type="checkbox"/>                            | Within past 2 years. |
| Mycosol, Inc.               | <input type="checkbox"/>                                                                    | <input type="checkbox"/>                                                                     | <input type="checkbox"/>                                                                                       | <input type="checkbox"/>                                        | <input type="checkbox"/>           | <input checked="" type="checkbox"/>                              | <input type="checkbox"/>                            | Within past 2 years. |
| NABI Biopharma.             | <input type="checkbox"/>                                                                    | <input type="checkbox"/>                                                                     | <input type="checkbox"/>                                                                                       | <input type="checkbox"/>                                        | <input type="checkbox"/>           | <input checked="" type="checkbox"/>                              | <input type="checkbox"/>                            | Within past 2 years. |
| Neuron Pharmaceuticals      | <input type="checkbox"/>                                                                    | <input type="checkbox"/>                                                                     | <input type="checkbox"/>                                                                                       | <input type="checkbox"/>                                        | <input type="checkbox"/>           | <input checked="" type="checkbox"/>                              | <input type="checkbox"/>                            | Within past 2 years. |
| NicOx                       | <input type="checkbox"/>                                                                    | <input type="checkbox"/>                                                                     | <input checked="" type="checkbox"/>                                                                            | <input type="checkbox"/>                                        | <input type="checkbox"/>           | <input type="checkbox"/>                                         | <input type="checkbox"/>                            | Within past 2 years. |
| NitroMed                    | <input type="checkbox"/>                                                                    | <input type="checkbox"/>                                                                     | <input type="checkbox"/>                                                                                       | <input type="checkbox"/>                                        | <input type="checkbox"/>           | <input checked="" type="checkbox"/>                              | <input type="checkbox"/>                            | Within past 2 years. |
| NovaCardia Inc.             | <input type="checkbox"/>                                                                    | <input type="checkbox"/>                                                                     | <input type="checkbox"/>                                                                                       | <input type="checkbox"/>                                        | <input type="checkbox"/>           | <input checked="" type="checkbox"/>                              | <input type="checkbox"/>                            | Within past 2 years. |
| Novartis AG Group           | <input type="checkbox"/>                                                                    | <input type="checkbox"/>                                                                     | <input type="checkbox"/>                                                                                       | <input type="checkbox"/>                                        | <input type="checkbox"/>           | <input checked="" type="checkbox"/>                              | <input checked="" type="checkbox"/>                 | Within past 2 years. |
| Novartis Pharmaceutical     | <input type="checkbox"/>                                                                    | <input type="checkbox"/>                                                                     | <input type="checkbox"/>                                                                                       | <input type="checkbox"/>                                        | <input type="checkbox"/>           | <input checked="" type="checkbox"/>                              | <input type="checkbox"/>                            | Within past 2 years. |
| OLG Research                | <input type="checkbox"/>                                                                    | <input type="checkbox"/>                                                                     | <input checked="" type="checkbox"/>                                                                            | <input type="checkbox"/>                                        | <input type="checkbox"/>           | <input type="checkbox"/>                                         | <input type="checkbox"/>                            | Within past 2 years. |
| Ortho Biotech               | <input type="checkbox"/>                                                                    | <input type="checkbox"/>                                                                     | <input type="checkbox"/>                                                                                       | <input type="checkbox"/>                                        | <input type="checkbox"/>           | <input checked="" type="checkbox"/>                              | <input type="checkbox"/>                            | Within past 2 years. |
| OSI Eyetech                 | <input type="checkbox"/>                                                                    | <input type="checkbox"/>                                                                     | <input type="checkbox"/>                                                                                       | <input type="checkbox"/>                                        | <input type="checkbox"/>           | <input checked="" type="checkbox"/>                              | <input type="checkbox"/>                            | Within past 2 years. |
| Osiris Therapeutics         | <input type="checkbox"/>                                                                    | <input type="checkbox"/>                                                                     | <input type="checkbox"/>                                                                                       | <input type="checkbox"/>                                        | <input type="checkbox"/>           | <input checked="" type="checkbox"/>                              | <input type="checkbox"/>                            | Within past 2 years. |
| Otsuka Pharmaceutical Group | <input type="checkbox"/>                                                                    | <input type="checkbox"/>                                                                     | <input type="checkbox"/>                                                                                       | <input type="checkbox"/>                                        | <input type="checkbox"/>           | <input checked="" type="checkbox"/>                              | <input type="checkbox"/>                            | Within past 2 years. |
| Pathway Medical             | <input type="checkbox"/>                                                                    | <input type="checkbox"/>                                                                     | <input type="checkbox"/>                                                                                       | <input type="checkbox"/>                                        | <input type="checkbox"/>           | <input checked="" type="checkbox"/>                              | <input type="checkbox"/>                            | Within past 2 years. |

| Company                                         | (1) A research grant or contract from this company partially supports my university salary. | (2) Educational activities or lectures for this company generate revenue for the university. | (3) Consulting or other services (including CME and other non-CME) for this company generates personal income. | (4) I receive significant personal royalties from this company. | (5) I have equity in this company. | (6) This company has a research grant or contract with the DCRI. | (7) This company provides support for DCRI fellows. | Comments             |
|-------------------------------------------------|---------------------------------------------------------------------------------------------|----------------------------------------------------------------------------------------------|----------------------------------------------------------------------------------------------------------------|-----------------------------------------------------------------|------------------------------------|------------------------------------------------------------------|-----------------------------------------------------|----------------------|
| Technologies                                    |                                                                                             |                                                                                              |                                                                                                                |                                                                 |                                    |                                                                  |                                                     |                      |
| PDL bio Pharma                                  | <input type="checkbox"/>                                                                    | <input type="checkbox"/>                                                                     | <input type="checkbox"/>                                                                                       | <input type="checkbox"/>                                        | <input type="checkbox"/>           | <input checked="" type="checkbox"/>                              | <input type="checkbox"/>                            | Within past 2 years. |
| PDxRx, Inc.                                     | <input type="checkbox"/>                                                                    | <input type="checkbox"/>                                                                     | <input type="checkbox"/>                                                                                       | <input type="checkbox"/>                                        | <input type="checkbox"/>           | <input checked="" type="checkbox"/>                              | <input type="checkbox"/>                            | Within past 2 years. |
| Peregrine Pharmaceuticals                       | <input type="checkbox"/>                                                                    | <input type="checkbox"/>                                                                     | <input type="checkbox"/>                                                                                       | <input type="checkbox"/>                                        | <input type="checkbox"/>           | <input checked="" type="checkbox"/>                              | <input type="checkbox"/>                            | Within past 2 years. |
| Pfizer                                          | <input type="checkbox"/>                                                                    | <input type="checkbox"/>                                                                     | <input type="checkbox"/>                                                                                       | <input type="checkbox"/>                                        | <input type="checkbox"/>           | <input checked="" type="checkbox"/>                              | <input checked="" type="checkbox"/>                 | Within past 2 years. |
| Pharmacyclics                                   | <input type="checkbox"/>                                                                    | <input type="checkbox"/>                                                                     | <input type="checkbox"/>                                                                                       | <input type="checkbox"/>                                        | <input type="checkbox"/>           | <input checked="" type="checkbox"/>                              | <input type="checkbox"/>                            | Within past 2 years. |
| Pharmanetics                                    | <input type="checkbox"/>                                                                    | <input type="checkbox"/>                                                                     | <input type="checkbox"/>                                                                                       | <input type="checkbox"/>                                        | <input type="checkbox"/>           | <input checked="" type="checkbox"/>                              | <input type="checkbox"/>                            | Within past 2 years. |
| Pharmassest,                                    | <input type="checkbox"/>                                                                    | <input type="checkbox"/>                                                                     | <input type="checkbox"/>                                                                                       | <input type="checkbox"/>                                        | <input type="checkbox"/>           | <input checked="" type="checkbox"/>                              | <input type="checkbox"/>                            | Within past 2 years. |
| Portola Pharmaceutical                          | <input type="checkbox"/>                                                                    | <input type="checkbox"/>                                                                     | <input type="checkbox"/>                                                                                       | <input type="checkbox"/>                                        | <input type="checkbox"/>           | <input checked="" type="checkbox"/>                              | <input type="checkbox"/>                            | Within past 2 years. |
| Radiant                                         | <input type="checkbox"/>                                                                    | <input type="checkbox"/>                                                                     | <input type="checkbox"/>                                                                                       | <input type="checkbox"/>                                        | <input type="checkbox"/>           | <input checked="" type="checkbox"/>                              | <input type="checkbox"/>                            | Within past 2 years. |
| Reata Pharmaceuticals                           | <input type="checkbox"/>                                                                    | <input type="checkbox"/>                                                                     | <input type="checkbox"/>                                                                                       | <input type="checkbox"/>                                        | <input type="checkbox"/>           | <input checked="" type="checkbox"/>                              | <input type="checkbox"/>                            | Within past 2 years. |
| Recom Managed Systems, Inc.                     | <input type="checkbox"/>                                                                    | <input type="checkbox"/>                                                                     | <input type="checkbox"/>                                                                                       | <input type="checkbox"/>                                        | <input type="checkbox"/>           | <input checked="" type="checkbox"/>                              | <input type="checkbox"/>                            | Within past 2 years. |
| Regado Biosciences                              | <input type="checkbox"/>                                                                    | <input type="checkbox"/>                                                                     | <input type="checkbox"/>                                                                                       | <input type="checkbox"/>                                        | <input type="checkbox"/>           | <input checked="" type="checkbox"/>                              | <input type="checkbox"/>                            | Within past 2 years. |
| Reliant Pharmaceuticals                         | <input type="checkbox"/>                                                                    | <input type="checkbox"/>                                                                     | <input type="checkbox"/>                                                                                       | <input type="checkbox"/>                                        | <input type="checkbox"/>           | <input checked="" type="checkbox"/>                              | <input type="checkbox"/>                            | Within past 2 years. |
| Roche Diagnostic Corp.                          | <input type="checkbox"/>                                                                    | <input type="checkbox"/>                                                                     | <input type="checkbox"/>                                                                                       | <input type="checkbox"/>                                        | <input type="checkbox"/>           | <input checked="" type="checkbox"/>                              | <input type="checkbox"/>                            | Within past 2 years. |
| Salix Pharmaceuticals                           | <input type="checkbox"/>                                                                    | <input type="checkbox"/>                                                                     | <input type="checkbox"/>                                                                                       | <input type="checkbox"/>                                        | <input type="checkbox"/>           | <input checked="" type="checkbox"/>                              | <input type="checkbox"/>                            | Within past 2 years. |
| Sanofi-Pasteur, Inc. (formerly Aventis-Pasteur) | <input type="checkbox"/>                                                                    | <input type="checkbox"/>                                                                     | <input type="checkbox"/>                                                                                       | <input type="checkbox"/>                                        | <input type="checkbox"/>           | <input checked="" type="checkbox"/>                              | <input type="checkbox"/>                            | Within past 2 years. |
| Sanofi-Aventis                                  | <input type="checkbox"/>                                                                    | <input type="checkbox"/>                                                                     | <input checked="" type="checkbox"/>                                                                            | <input type="checkbox"/>                                        | <input type="checkbox"/>           | <input checked="" type="checkbox"/>                              | <input type="checkbox"/>                            | Within past 2 years. |
| Sanofi-Synthelabo.                              | <input type="checkbox"/>                                                                    | <input type="checkbox"/>                                                                     | <input checked="" type="checkbox"/>                                                                            | <input type="checkbox"/>                                        | <input type="checkbox"/>           | <input checked="" type="checkbox"/>                              | <input type="checkbox"/>                            | Within past 2 years. |
| Schering-Plough Corporation                     | <input checked="" type="checkbox"/>                                                         | <input checked="" type="checkbox"/>                                                          | <input checked="" type="checkbox"/>                                                                            | <input type="checkbox"/>                                        | <input type="checkbox"/>           | <input checked="" type="checkbox"/>                              | <input type="checkbox"/>                            | Within past 2 years. |
| SciClone Pharmaceuticals                        | <input type="checkbox"/>                                                                    | <input type="checkbox"/>                                                                     | <input type="checkbox"/>                                                                                       | <input type="checkbox"/>                                        | <input type="checkbox"/>           | <input checked="" type="checkbox"/>                              | <input type="checkbox"/>                            | Within past 2 years. |
| Scios                                           | <input type="checkbox"/>                                                                    | <input type="checkbox"/>                                                                     | <input type="checkbox"/>                                                                                       | <input type="checkbox"/>                                        | <input type="checkbox"/>           | <input checked="" type="checkbox"/>                              | <input type="checkbox"/>                            | Within past 2 years. |

| Company                               | (1) A research grant or contract from this company partially supports my university salary. | (2) Educational activities or lectures for this company generate revenue for the university. | (3) Consulting or other services (including CME and other non-CME) for this company generates personal income. | (4) I receive significant personal royalties from this company. | (5) I have equity in this company. | (6) This company has a research grant or contract with the DCRI. | (7) This company provides support for DCRI fellows. | Comments             |
|---------------------------------------|---------------------------------------------------------------------------------------------|----------------------------------------------------------------------------------------------|----------------------------------------------------------------------------------------------------------------|-----------------------------------------------------------------|------------------------------------|------------------------------------------------------------------|-----------------------------------------------------|----------------------|
| Seredigm                              | <input type="checkbox"/>                                                                    | <input type="checkbox"/>                                                                     | <input checked="" type="checkbox"/>                                                                            | <input type="checkbox"/>                                        | <input type="checkbox"/>           | <input type="checkbox"/>                                         | <input type="checkbox"/>                            | Within past 2 years. |
| Sicel Technologies                    | <input type="checkbox"/>                                                                    | <input type="checkbox"/>                                                                     | <input type="checkbox"/>                                                                                       | <input type="checkbox"/>                                        | <input type="checkbox"/>           | <input checked="" type="checkbox"/>                              | <input type="checkbox"/>                            | Within past 2 years. |
| Siemens                               | <input type="checkbox"/>                                                                    | <input type="checkbox"/>                                                                     | <input type="checkbox"/>                                                                                       | <input type="checkbox"/>                                        | <input type="checkbox"/>           | <input checked="" type="checkbox"/>                              | <input type="checkbox"/>                            | Within past 2 years. |
| Skyline Ventures                      | <input type="checkbox"/>                                                                    | <input type="checkbox"/>                                                                     | <input type="checkbox"/>                                                                                       | <input type="checkbox"/>                                        | <input type="checkbox"/>           | <input checked="" type="checkbox"/>                              | <input type="checkbox"/>                            | Within past 2 years. |
| Social Scientific Solutions           | <input type="checkbox"/>                                                                    | <input type="checkbox"/>                                                                     | <input type="checkbox"/>                                                                                       | <input type="checkbox"/>                                        | <input type="checkbox"/>           | <input checked="" type="checkbox"/>                              | <input type="checkbox"/>                            | Within past 2 years. |
| Spectranetics                         | <input type="checkbox"/>                                                                    | <input type="checkbox"/>                                                                     | <input type="checkbox"/>                                                                                       | <input type="checkbox"/>                                        | <input type="checkbox"/>           | <input checked="" type="checkbox"/>                              | <input type="checkbox"/>                            | Within past 2 years. |
| Summit                                | <input type="checkbox"/>                                                                    | <input type="checkbox"/>                                                                     | <input type="checkbox"/>                                                                                       | <input type="checkbox"/>                                        | <input type="checkbox"/>           | <input checked="" type="checkbox"/>                              | <input type="checkbox"/>                            | Within past 2 years. |
| Suneis                                | <input type="checkbox"/>                                                                    | <input type="checkbox"/>                                                                     | <input type="checkbox"/>                                                                                       | <input type="checkbox"/>                                        | <input type="checkbox"/>           | <input checked="" type="checkbox"/>                              | <input type="checkbox"/>                            | Within past 2 years. |
| TAP Pharmaceutical Products           | <input type="checkbox"/>                                                                    | <input type="checkbox"/>                                                                     | <input type="checkbox"/>                                                                                       | <input type="checkbox"/>                                        | <input type="checkbox"/>           | <input checked="" type="checkbox"/>                              | <input type="checkbox"/>                            | Within past 2 years. |
| Tengion                               | <input type="checkbox"/>                                                                    | <input type="checkbox"/>                                                                     | <input type="checkbox"/>                                                                                       | <input type="checkbox"/>                                        | <input type="checkbox"/>           | <input checked="" type="checkbox"/>                              | <input type="checkbox"/>                            | Within past 2 years. |
| Terumo Corporation                    | <input type="checkbox"/>                                                                    | <input type="checkbox"/>                                                                     | <input type="checkbox"/>                                                                                       | <input type="checkbox"/>                                        | <input type="checkbox"/>           | <input checked="" type="checkbox"/>                              | <input type="checkbox"/>                            | Within past 2 years. |
| The Medicines Company                 | <input checked="" type="checkbox"/>                                                         | <input type="checkbox"/>                                                                     | <input type="checkbox"/>                                                                                       | <input type="checkbox"/>                                        | <input type="checkbox"/>           | <input checked="" type="checkbox"/>                              | <input type="checkbox"/>                            | Within past 2 years. |
| Theravance                            | <input type="checkbox"/>                                                                    | <input type="checkbox"/>                                                                     | <input type="checkbox"/>                                                                                       | <input type="checkbox"/>                                        | <input type="checkbox"/>           | <input checked="" type="checkbox"/>                              | <input type="checkbox"/>                            | Within past 2 years. |
| TherOx, Inc.                          | <input type="checkbox"/>                                                                    | <input type="checkbox"/>                                                                     | <input type="checkbox"/>                                                                                       | <input type="checkbox"/>                                        | <input type="checkbox"/>           | <input checked="" type="checkbox"/>                              | <input type="checkbox"/>                            | Within past 2 years. |
| Thoratec Corporation                  | <input type="checkbox"/>                                                                    | <input type="checkbox"/>                                                                     | <input type="checkbox"/>                                                                                       | <input type="checkbox"/>                                        | <input type="checkbox"/>           | <input checked="" type="checkbox"/>                              | <input type="checkbox"/>                            | Within past 2 years. |
| Titan Pharmaceuticals                 | <input type="checkbox"/>                                                                    | <input type="checkbox"/>                                                                     | <input type="checkbox"/>                                                                                       | <input type="checkbox"/>                                        | <input type="checkbox"/>           | <input checked="" type="checkbox"/>                              | <input type="checkbox"/>                            | Within past 2 years. |
| United Therapeutics                   | <input type="checkbox"/>                                                                    | <input type="checkbox"/>                                                                     | <input type="checkbox"/>                                                                                       | <input type="checkbox"/>                                        | <input type="checkbox"/>           | <input checked="" type="checkbox"/>                              | <input type="checkbox"/>                            | Within past 2 years. |
| Uptake Medical Corporation            | <input type="checkbox"/>                                                                    | <input type="checkbox"/>                                                                     | <input type="checkbox"/>                                                                                       | <input type="checkbox"/>                                        | <input type="checkbox"/>           | <input checked="" type="checkbox"/>                              | <input type="checkbox"/>                            | Within past 2 years. |
| Valleylab                             | <input type="checkbox"/>                                                                    | <input type="checkbox"/>                                                                     | <input type="checkbox"/>                                                                                       | <input type="checkbox"/>                                        | <input type="checkbox"/>           | <input checked="" type="checkbox"/>                              | <input type="checkbox"/>                            | Within past 2 years. |
| Valeant Pharmaceuticals International | <input type="checkbox"/>                                                                    | <input type="checkbox"/>                                                                     | <input type="checkbox"/>                                                                                       | <input type="checkbox"/>                                        | <input type="checkbox"/>           | <input checked="" type="checkbox"/>                              | <input type="checkbox"/>                            | Within past 2 years. |
| Valentis, Inc.                        | <input type="checkbox"/>                                                                    | <input type="checkbox"/>                                                                     | <input type="checkbox"/>                                                                                       | <input type="checkbox"/>                                        | <input type="checkbox"/>           | <input checked="" type="checkbox"/>                              | <input type="checkbox"/>                            | Within past 2 years. |
| Vascular Solutions Inc.               | <input type="checkbox"/>                                                                    | <input type="checkbox"/>                                                                     | <input type="checkbox"/>                                                                                       | <input type="checkbox"/>                                        | <input type="checkbox"/>           | <input checked="" type="checkbox"/>                              | <input type="checkbox"/>                            | Within past 2 years. |

| Company                                            | (1) A research grant or contract from this company partially supports my university salary. | (2) Educational activities or lectures for this company generate revenue for the university. | (3) Consulting or other services (including CME and other non-CME) for this company generates personal income. | (4) I receive significant personal royalties from this company. | (5) I have equity in this company. | (6) This company has a research grant or contract with the DCRI. | (7) This company provides support for DCRI fellows. | Comments             |
|----------------------------------------------------|---------------------------------------------------------------------------------------------|----------------------------------------------------------------------------------------------|----------------------------------------------------------------------------------------------------------------|-----------------------------------------------------------------|------------------------------------|------------------------------------------------------------------|-----------------------------------------------------|----------------------|
| Velocimed, Inc.                                    | <input type="checkbox"/>                                                                    | <input type="checkbox"/>                                                                     | <input type="checkbox"/>                                                                                       | <input type="checkbox"/>                                        | <input type="checkbox"/>           | <input checked="" type="checkbox"/>                              | <input type="checkbox"/>                            | Within past 2 years. |
| Veridex                                            | <input type="checkbox"/>                                                                    | <input type="checkbox"/>                                                                     | <input type="checkbox"/>                                                                                       | <input type="checkbox"/>                                        | <input type="checkbox"/>           | <input checked="" type="checkbox"/>                              | <input type="checkbox"/>                            | Within past 2 years. |
| Vertex Pharmaceuticals                             | <input type="checkbox"/>                                                                    | <input type="checkbox"/>                                                                     | <input type="checkbox"/>                                                                                       | <input type="checkbox"/>                                        | <input type="checkbox"/>           | <input checked="" type="checkbox"/>                              | <input type="checkbox"/>                            | Within past 2 years. |
| VIASYS Healthcare                                  | <input type="checkbox"/>                                                                    | <input type="checkbox"/>                                                                     | <input type="checkbox"/>                                                                                       | <input type="checkbox"/>                                        | <input type="checkbox"/>           | <input checked="" type="checkbox"/>                              | <input type="checkbox"/>                            | Within past 2 years. |
| Vicuron Pharma. (formerly Versicor)                | <input type="checkbox"/>                                                                    | <input type="checkbox"/>                                                                     | <input type="checkbox"/>                                                                                       | <input type="checkbox"/>                                        | <input type="checkbox"/>           | <input checked="" type="checkbox"/>                              | <input type="checkbox"/>                            | Within past 2 years. |
| ViroChem Pharma, Inc.                              | <input type="checkbox"/>                                                                    | <input type="checkbox"/>                                                                     | <input type="checkbox"/>                                                                                       | <input type="checkbox"/>                                        | <input type="checkbox"/>           | <input checked="" type="checkbox"/>                              | <input type="checkbox"/>                            | Within past 2 years. |
| Watson Pharmaceuticals                             | <input type="checkbox"/>                                                                    | <input type="checkbox"/>                                                                     | <input type="checkbox"/>                                                                                       | <input type="checkbox"/>                                        | <input type="checkbox"/>           | <input checked="" type="checkbox"/>                              | <input type="checkbox"/>                            | Within past 2 years. |
| WebMD / the heart.org                              | <input type="checkbox"/>                                                                    | <input type="checkbox"/>                                                                     | <input checked="" type="checkbox"/>                                                                            | <input type="checkbox"/>                                        | <input type="checkbox"/>           | <input type="checkbox"/>                                         | <input type="checkbox"/>                            | Within past 2 years. |
| Wyeth                                              | <input type="checkbox"/>                                                                    | <input type="checkbox"/>                                                                     | <input type="checkbox"/>                                                                                       | <input type="checkbox"/>                                        | <input type="checkbox"/>           | <input checked="" type="checkbox"/>                              | <input type="checkbox"/>                            | Within past 2 years. |
| Xsira Pharmaceuticals (formerly Norak Biosciences) | <input type="checkbox"/>                                                                    | <input type="checkbox"/>                                                                     | <input type="checkbox"/>                                                                                       | <input type="checkbox"/>                                        | <input type="checkbox"/>           | <input checked="" type="checkbox"/>                              | <input type="checkbox"/>                            | Within past 2 years. |
| XTL Biopharma                                      | <input type="checkbox"/>                                                                    | <input type="checkbox"/>                                                                     | <input type="checkbox"/>                                                                                       | <input type="checkbox"/>                                        | <input type="checkbox"/>           | <input checked="" type="checkbox"/>                              | <input type="checkbox"/>                            | Within past 2 years. |

- 1) In addition to my oversight role as director of the DCRI, funding is provided for my effort in research grants or contracts for multicenter projects in which I serve as chairman, cochairman, or executive or steering committee member. A check in this column denotes that I am involved in such a research contract. Payments for the work performed for these contracts are made to the university. A portion of my salary as a faculty member, representative of percent effort on the project, has been supported by these funds.
- 2) I provide educational activities or deliver occasional lectures that generate revenue from this company. All revenues from these activities are paid to the university and deposited into a fellowship fund. None of it is taken for personal income.
- 3) I receive personal income from this company outside of my university salary for consulting or other services.
- 4) I receive royalties in excess of \$10,000 from this company.
- 5) I or an immediate member of my family have equity in this company >\$10,000 or >1% (with shareholder voting privileges).
- 6) As director of the Duke Clinical Research Institute, I benefit indirectly from DCRI's institutional grants and contracts. A check in this column denotes that a grant or contract was executed with this entity from January 1, 2007 to April 1, 2008. Projects conducted with this entity are either current or completed within that time frame.
- 7) Several companies provide fellowship support for the DCRI. A check in this column denotes this support.

## DCRI COMMERCIAL RELATIONSHIPS TRACKING FORM

Date: November 25, 2008

Name: Robert M. Califf, MD

Title: Director, Duke Translational Medicine Institute; Professor of Medicine, Duke University School of Medicine

Address: PO Box 17969, Durham, NC 27715

Monetary amounts are on an annual basis.

| Company                 | (1) A research grant or contract from this company partially supports my university salary and/or research projects. | (2) Educational activities or lectures for this company generate revenue for the university. | (3) Consulting or other services (including CME and other non-CME) for this company generates personal income. | (4) I receive significant personal royalties from this company. | (5) I have equity in this company.  | Comments             |
|-------------------------|----------------------------------------------------------------------------------------------------------------------|----------------------------------------------------------------------------------------------|----------------------------------------------------------------------------------------------------------------|-----------------------------------------------------------------|-------------------------------------|----------------------|
| Amylin                  | <input type="checkbox"/>                                                                                             | <input type="checkbox"/>                                                                     | <input checked="" type="checkbox"/>                                                                            | <input type="checkbox"/>                                        | <input type="checkbox"/>            | Within past 2 years. |
| Avalere Health          | <input type="checkbox"/>                                                                                             | <input type="checkbox"/>                                                                     | <input checked="" type="checkbox"/>                                                                            | <input type="checkbox"/>                                        | <input type="checkbox"/>            | Within past 2 years. |
| Bayer                   | <input type="checkbox"/>                                                                                             | <input type="checkbox"/>                                                                     | <input checked="" type="checkbox"/>                                                                            | <input type="checkbox"/>                                        | <input type="checkbox"/>            | Within past 2 years. |
| Biogen                  | <input type="checkbox"/>                                                                                             | <input type="checkbox"/>                                                                     | <input checked="" type="checkbox"/>                                                                            | <input type="checkbox"/>                                        | <input type="checkbox"/>            | Within past 2 years. |
| Boehringer Ingelheim    | <input type="checkbox"/>                                                                                             | <input type="checkbox"/>                                                                     | <input checked="" type="checkbox"/>                                                                            | <input type="checkbox"/>                                        | <input type="checkbox"/>            | Within past 2 years. |
| Boston Scientific       | <input type="checkbox"/>                                                                                             | <input type="checkbox"/>                                                                     | <input checked="" type="checkbox"/>                                                                            | <input type="checkbox"/>                                        | <input type="checkbox"/>            | Within past 2 years. |
| Brandeis University     | <input type="checkbox"/>                                                                                             | <input type="checkbox"/>                                                                     | <input checked="" type="checkbox"/>                                                                            | <input type="checkbox"/>                                        | <input type="checkbox"/>            | Within past 2 years. |
| Eli Lilly               | <input type="checkbox"/>                                                                                             | <input type="checkbox"/>                                                                     | <input checked="" type="checkbox"/>                                                                            | <input type="checkbox"/>                                        | <input type="checkbox"/>            | Within past 2 years. |
| FivePrime               | <input type="checkbox"/>                                                                                             | <input type="checkbox"/>                                                                     | <input checked="" type="checkbox"/>                                                                            | <input type="checkbox"/>                                        | <input type="checkbox"/>            | Within past 2 years. |
| GSK                     | <input type="checkbox"/>                                                                                             | <input type="checkbox"/>                                                                     | <input checked="" type="checkbox"/>                                                                            | <input type="checkbox"/>                                        | <input type="checkbox"/>            | Within past 2 years. |
| Heart.org               | <input type="checkbox"/>                                                                                             | <input checked="" type="checkbox"/>                                                          | <input checked="" type="checkbox"/>                                                                            | <input type="checkbox"/>                                        | <input type="checkbox"/>            | Within past 2 years. |
| Kowa Research Institute | <input type="checkbox"/>                                                                                             | <input checked="" type="checkbox"/>                                                          | <input checked="" type="checkbox"/>                                                                            | <input type="checkbox"/>                                        | <input type="checkbox"/>            | Within past 2 years. |
| Medtronic               | <input type="checkbox"/>                                                                                             | <input type="checkbox"/>                                                                     | <input checked="" type="checkbox"/>                                                                            | <input type="checkbox"/>                                        | <input type="checkbox"/>            | Within past 2 years. |
| Merck                   | <input checked="" type="checkbox"/>                                                                                  | <input type="checkbox"/>                                                                     | <input checked="" type="checkbox"/>                                                                            | <input type="checkbox"/>                                        | <input type="checkbox"/>            | Within past 2 years. |
| NITROX LLC              | <input type="checkbox"/>                                                                                             | <input type="checkbox"/>                                                                     | <input checked="" type="checkbox"/>                                                                            | <input type="checkbox"/>                                        | <input checked="" type="checkbox"/> | Within past 2 years. |
| Novartis Pharmaceutical | <input checked="" type="checkbox"/>                                                                                  | <input checked="" type="checkbox"/>                                                          | <input checked="" type="checkbox"/>                                                                            | <input type="checkbox"/>                                        | <input type="checkbox"/>            | Within past 2 years. |
| Pfizer                  | <input type="checkbox"/>                                                                                             | <input type="checkbox"/>                                                                     | <input type="checkbox"/>                                                                                       | <input type="checkbox"/>                                        | <input type="checkbox"/>            | Within past 2 years. |
| Roche                   | <input type="checkbox"/>                                                                                             | <input type="checkbox"/>                                                                     | <input checked="" type="checkbox"/>                                                                            | <input type="checkbox"/>                                        | <input type="checkbox"/>            | Within past 2 years. |

| Company         | (1) A research grant or contract from this company partially supports my university salary and/or research projects. | (2) Educational activities or lectures for this company generate revenue for the university. | (3) Consulting or other services (including CME and other non-CME) for this company generates personal income. | (4) I receive significant personal royalties from this company. | (5) I have equity in this company. | Comments             |
|-----------------|----------------------------------------------------------------------------------------------------------------------|----------------------------------------------------------------------------------------------|----------------------------------------------------------------------------------------------------------------|-----------------------------------------------------------------|------------------------------------|----------------------|
| Sanofi-Aventis  | <input type="checkbox"/>                                                                                             | <input type="checkbox"/>                                                                     | <input checked="" type="checkbox"/>                                                                            | <input type="checkbox"/>                                        | <input type="checkbox"/>           | Within past 2 years. |
| Schering Plough | <input checked="" type="checkbox"/>                                                                                  | <input type="checkbox"/>                                                                     | <input checked="" type="checkbox"/>                                                                            | <input type="checkbox"/>                                        | <input type="checkbox"/>           | Within past 2 years. |
| Scios Pharma    | <input checked="" type="checkbox"/>                                                                                  | <input type="checkbox"/>                                                                     | <input checked="" type="checkbox"/>                                                                            | <input type="checkbox"/>                                        | <input type="checkbox"/>           | Within past 2 years. |
| SCIUS           | <input type="checkbox"/>                                                                                             | <input type="checkbox"/>                                                                     | <input checked="" type="checkbox"/>                                                                            | <input type="checkbox"/>                                        | <input type="checkbox"/>           | Within past 2 years. |
| Targacept       | <input type="checkbox"/>                                                                                             | <input type="checkbox"/>                                                                     | <input checked="" type="checkbox"/>                                                                            | <input type="checkbox"/>                                        | <input type="checkbox"/>           | Within past 2 years. |
| Univ of Florida | <input type="checkbox"/>                                                                                             | <input type="checkbox"/>                                                                     | <input checked="" type="checkbox"/>                                                                            | <input type="checkbox"/>                                        | <input type="checkbox"/>           | Within past 2 years. |
| Vertex          | <input type="checkbox"/>                                                                                             | <input type="checkbox"/>                                                                     | <input checked="" type="checkbox"/>                                                                            | <input type="checkbox"/>                                        | <input type="checkbox"/>           | Within past 2 years. |
| Vivus           | <input type="checkbox"/>                                                                                             | <input type="checkbox"/>                                                                     | <input checked="" type="checkbox"/>                                                                            | <input type="checkbox"/>                                        | <input type="checkbox"/>           | Within past 2 years. |

- 1) In addition to my oversight role as director of the Duke Translational Medicine Institute, funding is provided for my effort in research grants or contracts for multicenter projects in which I serve as chairman, cochairman, or executive or steering committee member. A check in this column denotes that I am involved in such a research contract. Payments for the work performed for these contracts are made to the university. A portion of my salary as a faculty member, representative of percent effort on the project, has been supported by these funds.
- 2) I provide educational activities or deliver occasional lectures that generate revenue from this company. All revenues from these activities are paid to the university and deposited into a fellowship fund. None of it is taken for personal income.
- 3) I personally receive income from these companies. All consulting income is donated to nonprofit organizations, with the majority going to the clinical research fellowship fund of the Duke Clinical Research Institute.
- 4) I receive royalties in excess of \$10,000 from this company.
- 5) I or an immediate member of my family have equity in this company >\$10,000 or >1% (with shareholder voting privileges).

## DCRI COMMERCIAL RELATIONSHIPS TRACKING FORM

Date: November 25, 2008

Name: Kevin A. Schulman, MD

Title: Associate Director, DCRI; Professor of Medicine, Duke University School of Medicine

Address: Duke Clinical Research Institute, PO Box 17969, Durham, NC 27715

Monetary amounts are on an annual basis.

| Company                                          | (1) A research grant or contract from this company partially supports my university salary and/or research projects. | (2) Educational activities or lectures for this company generate revenue for the university. | (3) Consulting or other services (including CME and other non-CME) for this company generates personal income. | (4) I receive significant personal royalties from this company. | (5) I have equity in this company.  | Comments                                  |
|--------------------------------------------------|----------------------------------------------------------------------------------------------------------------------|----------------------------------------------------------------------------------------------|----------------------------------------------------------------------------------------------------------------|-----------------------------------------------------------------|-------------------------------------|-------------------------------------------|
| Actelion Pharmaceuticals Ltd                     | <input checked="" type="checkbox"/>                                                                                  | <input type="checkbox"/>                                                                     | <input type="checkbox"/>                                                                                       | <input type="checkbox"/>                                        | <input type="checkbox"/>            | Within past 2 years.                      |
| Advanced Health Media                            | <input type="checkbox"/>                                                                                             | <input type="checkbox"/>                                                                     | <input checked="" type="checkbox"/>                                                                            | <input type="checkbox"/>                                        | <input type="checkbox"/>            | Within past 2 years.                      |
| Allergan Pharmaceuticals                         | <input checked="" type="checkbox"/>                                                                                  | <input type="checkbox"/>                                                                     | <input type="checkbox"/>                                                                                       | <input type="checkbox"/>                                        | <input type="checkbox"/>            | Within past 2 years.                      |
| Alnylam Pharmaceuticals, Inc                     | <input type="checkbox"/>                                                                                             | <input type="checkbox"/>                                                                     | <input type="checkbox"/>                                                                                       | <input type="checkbox"/>                                        | <input checked="" type="checkbox"/> | Within past 2 years.                      |
| American College of Medical Genetics             | <input type="checkbox"/>                                                                                             | <input type="checkbox"/>                                                                     | <input type="checkbox"/>                                                                                       | <input checked="" type="checkbox"/>                             | <input type="checkbox"/>            | Within past 2 years.                      |
| American Society of Clinical Oncology            | <input type="checkbox"/>                                                                                             | <input type="checkbox"/>                                                                     | <input type="checkbox"/>                                                                                       | <input checked="" type="checkbox"/>                             | <input type="checkbox"/>            | Within past 2 years.                      |
| Amgen Inc                                        | <input checked="" type="checkbox"/>                                                                                  | <input type="checkbox"/>                                                                     | <input type="checkbox"/>                                                                                       | <input type="checkbox"/>                                        | <input type="checkbox"/>            | Within past 2 years.                      |
| Arthritis Foundation                             | <input checked="" type="checkbox"/>                                                                                  | <input type="checkbox"/>                                                                     | <input type="checkbox"/>                                                                                       | <input type="checkbox"/>                                        | <input type="checkbox"/>            | Within past 2 years.                      |
| Astellas Pharma Inc                              | <input checked="" type="checkbox"/>                                                                                  | <input type="checkbox"/>                                                                     | <input type="checkbox"/>                                                                                       | <input type="checkbox"/>                                        | <input type="checkbox"/>            | Within past 2 years.                      |
| Bristol-Myers Squibb Company                     | <input checked="" type="checkbox"/>                                                                                  | <input type="checkbox"/>                                                                     | <input type="checkbox"/>                                                                                       | <input type="checkbox"/>                                        | <input type="checkbox"/>            | Within past 2 years.                      |
| Cancer Consultants, Inc                          | <input type="checkbox"/>                                                                                             | <input type="checkbox"/>                                                                     | <input type="checkbox"/>                                                                                       | <input type="checkbox"/>                                        | <input checked="" type="checkbox"/> | Dr Schulman is on the board of directors. |
| Certified Medical Representatives Institute, Inc | <input type="checkbox"/>                                                                                             | <input type="checkbox"/>                                                                     | <input type="checkbox"/>                                                                                       | <input checked="" type="checkbox"/>                             | <input type="checkbox"/>            | Within past 2 years.                      |
| The Duke Endowment                               | <input checked="" type="checkbox"/>                                                                                  | <input type="checkbox"/>                                                                     | <input type="checkbox"/>                                                                                       | <input type="checkbox"/>                                        | <input type="checkbox"/>            | Within past 2 years.                      |
| East Carolina University                         | <input type="checkbox"/>                                                                                             | <input type="checkbox"/>                                                                     | <input type="checkbox"/>                                                                                       | <input checked="" type="checkbox"/>                             | <input type="checkbox"/>            | Within past 2 years.                      |
| Faculty Connection, LLC                          | <input type="checkbox"/>                                                                                             | <input type="checkbox"/>                                                                     | <input type="checkbox"/>                                                                                       | <input type="checkbox"/>                                        | <input checked="" type="checkbox"/> | Dr Schulman is on the executive board.    |

|                                      |                                     |                          |                          |                                     |                          |                      |
|--------------------------------------|-------------------------------------|--------------------------|--------------------------|-------------------------------------|--------------------------|----------------------|
| Inspire Pharmaceuticals, Inc         | <input checked="" type="checkbox"/> | <input type="checkbox"/> | <input type="checkbox"/> | <input type="checkbox"/>            | <input type="checkbox"/> | Within past 2 years. |
| Johnson & Johnson                    | <input type="checkbox"/>            | <input type="checkbox"/> | <input type="checkbox"/> | <input checked="" type="checkbox"/> | <input type="checkbox"/> | Within past 2 years. |
| McKinsey & Company, Inc              | <input type="checkbox"/>            | <input type="checkbox"/> | <input type="checkbox"/> | <input checked="" type="checkbox"/> | <input type="checkbox"/> | Within past 2 years. |
| Medical Decisions Network            | <input type="checkbox"/>            | <input type="checkbox"/> | <input type="checkbox"/> | <input checked="" type="checkbox"/> | <input type="checkbox"/> | Within past 2 years. |
| Medtronic, Inc                       | <input checked="" type="checkbox"/> | <input type="checkbox"/> | <input type="checkbox"/> | <input type="checkbox"/>            | <input type="checkbox"/> | Within past 2 years. |
| National Patient Advocate Foundation | <input checked="" type="checkbox"/> | <input type="checkbox"/> | <input type="checkbox"/> | <input type="checkbox"/>            | <input type="checkbox"/> | Within past 2 years. |
| National Pharmaceutical Council      | <input type="checkbox"/>            | <input type="checkbox"/> | <input type="checkbox"/> | <input checked="" type="checkbox"/> | <input type="checkbox"/> | Within past 2 years. |
| NovaCardia                           | <input checked="" type="checkbox"/> | <input type="checkbox"/> | <input type="checkbox"/> | <input type="checkbox"/>            | <input type="checkbox"/> | Within past 2 years. |
| Novartis                             | <input checked="" type="checkbox"/> | <input type="checkbox"/> | <input type="checkbox"/> | <input type="checkbox"/>            | <input type="checkbox"/> | Within past 2 years. |
| OSI Eyetech                          | <input checked="" type="checkbox"/> | <input type="checkbox"/> | <input type="checkbox"/> | <input type="checkbox"/>            | <input type="checkbox"/> | Within past 2 years. |
| Quintiles Transnational Corp         | <input type="checkbox"/>            | <input type="checkbox"/> | <input type="checkbox"/> | <input checked="" type="checkbox"/> | <input type="checkbox"/> | Within past 2 years. |
| Sanofi-Aventis                       | <input checked="" type="checkbox"/> | <input type="checkbox"/> | <input type="checkbox"/> | <input type="checkbox"/>            | <input type="checkbox"/> | Within past 2 years. |
| Social & Scientific Systems, Inc     | <input type="checkbox"/>            | <input type="checkbox"/> | <input type="checkbox"/> | <input checked="" type="checkbox"/> | <input type="checkbox"/> | Within past 2 years. |
| Tengion                              | <input checked="" type="checkbox"/> | <input type="checkbox"/> | <input type="checkbox"/> | <input type="checkbox"/>            | <input type="checkbox"/> | Within past 2 years. |
| Theravance, Inc                      | <input checked="" type="checkbox"/> | <input type="checkbox"/> | <input type="checkbox"/> | <input type="checkbox"/>            | <input type="checkbox"/> | Within past 2 years. |
| Thomson Healthcare                   | <input checked="" type="checkbox"/> | <input type="checkbox"/> | <input type="checkbox"/> | <input type="checkbox"/>            | <input type="checkbox"/> | Within past 2 years. |
| Vertex Pharmaceuticals               | <input checked="" type="checkbox"/> | <input type="checkbox"/> | <input type="checkbox"/> | <input type="checkbox"/>            | <input type="checkbox"/> | Within past 2 years. |
| Wallen and Associates                | <input type="checkbox"/>            | <input type="checkbox"/> | <input type="checkbox"/> | <input checked="" type="checkbox"/> | <input type="checkbox"/> | Within past 2 years. |

- 1) A research grant from this organization funds my effort for projects in which I serve as an investigator or other member of the study team. The company makes payments to the university for the work performed under these contracts. These funds support a portion of my salary as a faculty member reflecting a percent effort on the project and/or supports expenses associated with projects at the university that are under my direction.
- 2) I provide educational activities or deliver occasional lectures that generate revenue from this company. The company pays all revenues from these activities to the university. I take none of the the revenues for personal income.
- 3) I receive personal income from this company outside of my university salary for consulting or other services.
- 4) I receive royalties in excess of \$10,000 from this company.
- 5) I or an immediate member of my family have equity in this company (with shareholder voting privileges).
